# Supplementary material for: The need to integrate mass- and energy-based metrics with life cycle impacts for sustainable chemicals manufacture
Source: Royal Society of Chemistry journal article supplement (doi:10.1039/d4gc00394b), 2024-01-01
Supplement: d4gc00394b1.pdf [file d4gc00394b1.pdf]

## Electronic Supporting Information

### **The need to integrate mass- and energy-based metrics with life cycle impacts for sustainable chemicals manufacture**

*Elysia Lucas, Antonio J. Martín, Sharon Mitchell, Abhinandan Nabera, Lucas F. Santos, Javier Pérez-Ramírez\*, Gonzalo Guillén-Gosalbez\**

Institute for Chemical and Bioengineering, Department of Chemistry and Applied Biosciences, ETH Zürich, Vladimir-Prelog-Weg 1, 8093 Zürich, Switzerland.

\*Corresponding authors: [jpr@chem.ethz.ch](mailto:jpr@chem.ethz.ch), [gonzalo.quillen.gosalbez@chem.ethz.ch](mailto:gonzalo.quillen.gosalbez@chem.ethz.ch)

## Table of Contents

|                                                                                                                       |    |
|-----------------------------------------------------------------------------------------------------------------------|----|
| S1. Detailed methodology.....                                                                                         | 3  |
| S2. Life cycle assessment method and data .....                                                                       | 8  |
| S3. Scatter plots – process mass- and energy-based metric scores vs. Environmental Footprint life cycle impacts ..... | 24 |
| S4. Mean and degree of variation of life cycle impact contributions from main process drivers .....                   | 41 |
| S5. Life cycle impact contributions along a supply chain.....                                                         | 45 |
| S6. Assumptions and limitations .....                                                                                 | 47 |

## S1. Detailed methodology

### Stage 1: Compiling data on chemical production processes

Process level and life cycle inventory data for chemical production processes were first compiled from the ecoinvent v3.9 life cycle inventory (LCI) database.<sup>1</sup> The ecoinvent database contains a wide variety of datasets on the production of chemical products such as agrochemicals (fertilisers, pesticides, plant growth regulators, etc.), ink and paints, bulk, and specialised chemicals. Data on each chemical production process covers mass and energy flows in and out of all synthesis and processing steps to reach final product.

For this analysis, we selected chemical processes, representing production globally, in the ecoinvent database with sufficient data to compute all metrics of interest. Using Brightway2<sup>2</sup> to manage ecoinvent's life-cycle inventory datasets, we started selecting chemical production activities based on their international standard industrial classification (ISIC) revision 4.<sup>3</sup> More specifically, we initially included all activities with ISIC starting with "20" (Manufacture of chemicals and chemical products) or "21" (Manufacture of pharmaceuticals, medicinal chemical and botanical products), resulting in around 1407 datasets. Then, the chemical corresponding to the reference product (or the CAS number if available) of each activity was identified using the Chemical Identifier Resolver, leading to 795 datasets of unique, unambiguous chemicals production with an associated SMILE structure. Additionally, in order to comply with complete datasets only, we filtered out system process (*i.e.*, cradle-to-gate aggregated of life-cycle environmental flows and no technosphere inputs), resulting in 762 datasets. Also, we removed activities with no waste streams or emission data, leading to 731 datasets. Two activities were also dropped from our analysis as they did not include energy inputs. Finally, we eliminated activities for which mass balance did not hold, resulting in the final 711 chemical production datasets.

The final dataset is comprised of 711 chemical processes, producing a range of organic (70% of the dataset) and inorganic (30% of the dataset) compounds (see **Table S2** for a complete list). Notable structural types of organic compounds constituting considerable portions of the dataset include benzenoids (*e.g.*, simpler compounds such as phenol (C<sub>6</sub>H<sub>5</sub>OH) and aniline (C<sub>6</sub>H<sub>5</sub>NH<sub>2</sub>), and larger molecules such as aclonifen (C<sub>12</sub>H<sub>9</sub>ClN<sub>2</sub>O<sub>3</sub>) and dioctyl terephthalate (C<sub>24</sub>H<sub>38</sub>O<sub>4</sub>)) and organic acids and their derivatives (*e.g.*, formic acid (CH<sub>2</sub>O<sub>2</sub>), mancozeb (C<sub>40</sub>H<sub>60</sub>Mn<sub>9</sub>N<sub>20</sub>S<sub>40</sub>Zn)). For inorganic compounds, the dataset mostly covers structures of mixed metal/non-metal compounds (*e.g.*, lithium fluoride (LiF), sodium tripolyphosphate (Na<sub>5</sub>P<sub>3</sub>O<sub>10</sub>)) and homogeneous non-metal compounds (*e.g.*, ammonium nitrate (NH<sub>4</sub>NO<sub>3</sub>), phosphorus pentachloride (PCl<sub>5</sub>)). The production data in the ecoinvent LCI database typically represent business-as-usual synthesis and manufacturing routes.

## Stage 2: Calculating environmental performance metrics

Various mass- and energy-based metrics and life cycle impacts were then calculated for each chemical process. We used process-level (*i.e.*, process input and output mass flows) and LCI data to compute process E-factor (including and excluding water), PMI, Mass Intensity (MI), Process Energy Intensity (PEI) and life cycle impacts for 16 environmental impact categories.

The E-factor,<sup>4</sup> PMI,<sup>4</sup> and MI<sup>5,6</sup> of each process were calculated using its associated process-level data in ecoinvent v3.9 on mass outputs (*e.g.*, emissions to air and water, wastewater, or solid waste streams from system) as in **Equation (S1)** and inputs (*e.g.*, reactants and reagents into system) as in **Equation (S2)**. Two variants of the E-factor metric were evaluated – one in which water and wastewater streams are accounted for in the numerator of **Equation (S1)** ('complete'; henceforth referred to E-factor including water and abbreviated as cEF) and the other in which water and wastewater streams are excluded ('partial'; henceforth referred to as E-factor excluding water and abbreviated as pEF). Similarly, PMI and MI both represent input resource efficiency but differ by the inclusion of water inputs in the numerator of **Equation (S2)** – *i.e.*, water is included in the calculation of PMI and excluded for MI.

$$\text{E-factor} = \text{Mass of waste and environmental emissions [kg]} / \text{Mass of product [kg]} \quad (\text{S1})$$

$$(\text{P})\text{MI} = \text{Mass of all inputs [kg]} / \text{Mass of product [kg]} \quad (\text{S2})$$

Energy intensities were also computed using foreground data in ecoinvent v3.9 by summing the amounts of input electricity and heating into each process [**Equation (S3)**].

$$\text{PEI} = \text{Amount of energy inputs into process [MJ]} / \text{Mass of product [kg]} \quad (\text{S3})$$

The attributional life cycle impacts of each chemical production process (per kg of product) were calculated in Brightway2<sup>2</sup> using the Environmental Footprint (EF) v3 life cycle impact assessment (LCIA) method as recommended by the European Commission.<sup>7</sup> The 'Allocation, cut-off by classification' system model<sup>1</sup> of the ecoinvent v3.9 database was used. **Section S2** briefly describes the methodology adopted in this study to calculate the life cycle impact-based metrics using Life Cycle Assessments (LCAs).

The EF LCIA method characterises life cycle data into 16 environmental impact categories spanning a broad range of environmental levels: climate change, pollution (ozone depletion, particulate matter formation, ionising radiation, photochemical ozone formation, acidification, freshwater/marine/terrestrial eutrophication), resources (land use, water use, minerals and metals use, fossil resource use) and toxicity (carcinogenic and non-carcinogenic human toxicity, freshwater ecotoxicity). In a European context, the EF method is the European

Commission's recommended LCIA method for assessing the environmental impact of products.<sup>7</sup> It is also the adopted method for executing the environmental sustainability assessment step in the European Commission's Safe and Sustainable by Design chemicals and materials framework as it is considered to cover the most basic set of impacts for any LCA study.<sup>8</sup> Moreover, in a recent study, these life cycle impact metrics were linked to a number of Sustainable Development Goals, providing a framework to quantify the progress made towards wider global sustainability.<sup>9</sup>

The mass- and energy-based metrics we calculate in this analysis relate to the performance of only the process system (*i.e.*, process gate-to-gate), while life cycle impacts account for impacts embedded in all material and energy inputs to the process, from the process itself, as well as from the treatment or disposal of waste streams (*i.e.*, cradle-to-gate). The expansion of system boundaries for mass-based metrics has been previously proposed, *e.g.*, the inclusion of 'intrinsic' E-factors which incorporate the embedded waste intensities of procured raw materials.<sup>10,11</sup> Accounting for the inherent resource or waste intensities of input materials could lead to appreciable worsening of the environmental score of a process, especially if input materials are advanced intermediates with multiple complex synthesis steps. In this analysis, however, we consider only 'traditional' gate-to-gate system boundaries for the E-factor, PMI, MI and PEI as there is no agreed standard on the cut-off criterion for the starting point of raw materials. Consequently, there is great uncertainty on whether 'intrinsic' mass-based metrics are commonly utilised in practice given this lack of standardisation and the additional data needed regarding procured materials.

### **Stage 3: Analysing scores to uncover trends in mass-, energy- and life cycle impact-based metrics**

Following the computation of all metrics, we sought to investigate (i) if and to what extent mass- and energy-based metrics correlate with life cycle impacts, and (ii) what the main contributing factors are to the life cycle impact of a chemical process and how they relate to the scope of mass- and energy-based process metrics.

Spearman's Rank correlation analysis was used to measure the strength and direction of association between each mass- or energy-based metric and life cycle impact score of all chemical processes in our dataset. Spearman's Rank tests for a monotonic relationship between metrics, *i.e.*, testing whether when the value of one variable increases, the value of the other increases or decreases regardless of the type of relationship between the variables (*e.g.*, linear or nonlinear). More specifically, the strength of association between the *ranks* of metric and impact scores is measured. Additionally, this correlation testing technique does not assume that the relationship between the variables being investigated are linear and this flexibility is a key factor in why it was selected for this analysis.

To delve deeper into the presence or absence of any correlation between metrics, the contributions from various process aspects (*e.g.*, material inputs, energy, waste treatment) to life cycle impacts were examined. The life cycle impacts of each chemical production process were disaggregated to contributions from every process input and output, allowing for the major contributors, or hotspots, to be identified.

**Table S1.** Definitions of terminology.

| <b>Term</b>                          | <b>Definition</b>                                                                                                                                                                                                                                                         |
|--------------------------------------|---------------------------------------------------------------------------------------------------------------------------------------------------------------------------------------------------------------------------------------------------------------------------|
| Mass- or energy-based process metric | Metric measuring the amount of material (mass-based with unit of kilogram) or amount of electricity, heat, and fuel (energy-based with unit of megajoule of energy) directly into or out of a chemical process (all synthesis and processing steps in production system). |
| Process Mass Intensity (PMI)         | Mass (kilograms) of all input materials including water into a chemical process (all synthesis and processing steps in production system) per kilogram of product.                                                                                                        |
| Mass Intensity (MI)                  | Mass (kilograms) of all input materials excluding water into a chemical process (all synthesis and processing steps in production system) per kilogram of product.                                                                                                        |
| E-factor including water             | Mass (kilograms) of all waste streams including water and wastewater from a chemical process (all synthesis and processing steps in production system).                                                                                                                   |
| E-factor excluding water             | Mass (kilograms) of all waste streams excluding water and wastewater from a chemical process (all synthesis and processing steps in production system).                                                                                                                   |
| Life Cycle Assessment (LCA)          | Method to estimate the overall environmental impacts associated with the wider life cycle (production, distribution, use and end-of-life phases) of a chosen system of interest ( <i>e.g.</i> , a product, activity, or process).                                         |
| Life Cycle Inventory (LCI)           | Data on amounts of all inputs (material, resource, and energy) and outputs (products, waste streams, emissions).                                                                                                                                                          |
| System boundary                      | Activities in the product/process' life cycle that are included and analysed.                                                                                                                                                                                             |
| Cradle-to-gate                       | A type of system boundary considering only inputs/outputs from resource extraction (cradle) to factory gate (before distribution and supply).                                                                                                                             |
| Gate-to-gate                         | A type of system boundary considering only inputs/outputs from reception of resources and energy (entry factory gate) to final product at factory exit gate.                                                                                                              |

## S2. Life cycle assessment method and data

### Life cycle assessment methodology

We investigate the environmental impacts of chemical production processes available in the ecoinvent v3.9 database. We conduct an attributional LCA of all the chemical processes following the four different phases outlined in ISO 14040 and 14044 standards.<sup>12,13</sup> In the first phase of the analysis, we define the goal and scope of our study. In this work, we consider the functional unit as the production of 1 kg of a chemical (as shown in **Table S2**) *via* a specific production technology as defined in the ecoinvent database, the details of which are described below. We follow a cradle-to-gate approach, encompassing all the upstream flows from the technosphere ( $A$ ) matrix (e.g., electricity) and biosphere ( $B$ ) matrix (e.g., emissions and inputs from nature) required for the production of the chemical under consideration. We choose the cradle-to-gate approach to avoid assumptions regarding the use of the chemical later downstream due to uncertainties in performing such an analysis. We quantify the global average impact of the chemical production process. For this, we rely on 'global' or 'rest of the world' inventories in the ecoinvent database. In cases where the global datasets are not available, we rely on European (RER) inventories for our analysis.

In phase 2 of our LCA, which involves the inventory analysis, we compiled datasets from the ecoinvent v3.9 database. The ecoinvent database consists of numerous datasets across various sectors. For this analysis, we selected chemical processes with sufficient data to compute all metrics considered in this study, as thoroughly explained in **Section S1**.

Phase 3 encompasses the LCIA, where we used Brightway2 to assess multiple impact categories and discover potential hidden trade-offs. Given a final demand vector ( $f$ ) defined from the functional unit, the inventory vector ( $g$ ) is calculated with the following equation:

$$g = B A^{-1} f \quad (\text{S4})$$

where  $A$  and  $B$  are the technosphere and biosphere matrices.<sup>14</sup> We utilise the Environmental Footprint (EF) v3 methods to quantify 16 impact categories.<sup>7</sup> The impact assessment vector ( $h$ ) is calculated using the following equation:

$$h = Q g \quad (\text{S5})$$

where  $Q$  represents the characterisation factors.<sup>14</sup> These factors assign numerical values to the impact depending on the method employed, thereby representing the environmental impact potential of each flow. Therefore, **Equation (S5)** provides a quantification of the overall environmental impacts associated with a chemical production process, in terms of the chosen



impact category. In the final phase of the LCA, we interpret the results by analysing impacts to discover correlations among mass, energy, and life cycle impact-based metrics.

### **Database details**

The 'Allocation, cut-off classification' system model of the ecoinvent v3.9 database<sup>1</sup> was used to generate process-level mass- and energy-based metrics and Environmental Footprint life cycle impacts. The 'cut-off' nature of this system model relates to the consideration of recycled and recyclable materials.<sup>1</sup>

For multi-product systems, ecoinvent applies economic allocation - *i.e.*, attributing process input and emission flows to each co-product based on economic price. Such allocation is maintained for the calculation of life cycle environmental impacts via the Environmental Footprint method. In other words, for processes with multiple products, the 'burden' of environmental impacts is shared among the products according to their economic value.

To calculate process metrics (E-factor, Process Mass Intensity, Mass Intensity and Process Energy Intensity), unallocated (*i.e.*, the values of input and emission flows prior to economic allocation) inventory data was used in which process input and emission flows maintain material and energy balances.

The inventories of the 711 chemical production processes extracted from the ecoinvent v3.9 database encompass different sources from both industry and literature,<sup>1</sup> providing detailed insights into the production processes of these chemicals. The ecoinvent database is typically used as a 'background' database, containing numerous background processes, including waste treatment, electricity, heating, cooling, and the manufacturing of chemicals. Despite the valuable information and robust datasets available in the ecoinvent database, there are still data gaps. For example, in Europe alone, approximately 20,000 chemicals are traded commercially.<sup>15</sup> These data gaps act as limitations of our study.

## List of chemical processes

**Table S2.** Activity name, product compound name and geographical context for each chemical production process from the ecoinvent v3.9 database that was analysed in this study.

| <b>ecoinvent v3.9 activity name</b>                                 | <b>Product</b>               | <b>Location</b> |
|---------------------------------------------------------------------|------------------------------|-----------------|
| barium sulfide production                                           | barium sulfide               | Global          |
| sodium dithionite production, anhydrous                             | sodium dithionite, anhydrous | Europe          |
| methyl-3-methoxypropionate production                               | methyl-3-methoxypropionate   | Global          |
| anthranilic acid production                                         | anthranilic acid             | Europe          |
| dichlobenil production                                              | dichlobenil                  | Global          |
| aniline production                                                  | aniline                      | Europe          |
| resorcinol production, hydroperoxidation of meta-diisopropylbenzene | resorcinol                   | Global          |
| 4-tert-butylbenzaldehyde production                                 | 4-tert-butylbenzaldehyde     | Europe          |
| trichloroacetic acid production                                     | trichloroacetic acid         | Europe          |
| phosphorus oxychloride production, from phosphorus trichloride      | phosphorus oxychloride       | Rest of World   |
| acetanilide production                                              | acetanilide                  | Rest of World   |
| pentaerythritol production in sodium hydroxide solution             | sodium formate               | Europe          |
| calcium ammonium nitrate production                                 | calcium ammonium nitrate     | China           |
| isoproturon production                                              | isoproturon                  | Europe          |
| sodium cyanide production                                           | sodium cyanide               | Europe          |
| Sohio process                                                       | acrylonitrile                | Europe          |
| lactic acid production                                              | lactic acid                  | Rest of World   |
| chlorpropham production                                             | chlorpropham                 | Global          |
| sodium phenolate production                                         | sodium phenolate             | Europe          |
| 2-nitroaniline production                                           | 2-nitroaniline               | Rest of World   |
| carbon disulfide production, from natural gas                       | carbon disulfide             | Global          |
| Sohio process                                                       | hydrogen cyanide             | Europe          |
| trichloroethylene production                                        | trichloroethylene            | Rest of World   |
| chlorosulfonic acid production                                      | chlorosulfonic acid          | Europe          |
| phosphorus trichloride production                                   | phosphorus trichloride       | Global          |
| dichloromethane production                                          | dichloromethane              | Rest of World   |
| benzyl alcohol production                                           | benzyl alcohol               | Europe          |
| lithium hexafluorophosphate production                              | lithium hexafluorophosphate  | Rest of World   |
| carbon tetrachloride production                                     | carbon tetrachloride         | Europe          |
| phenol production, from cumene                                      | phenol                       | Rest of World   |
| tetrahydrofuran production                                          | tetrahydrofuran              | Rest of World   |
| lithium iron phosphate production, solid state process              | lithium iron phosphate       | China           |
| potassium hydroxide production                                      | chlorine, gaseous            | Europe          |
| Sohio process                                                       | hydrogen cyanide             | Rest of World   |
| hydroxylamine production                                            | hydroxylamine                | Europe          |
| chloropropionic acid production                                     | chloropropionic acid         | Europe          |
| isohexane production                                                | isohexane                    | Rest of World   |
| ethylene bromide production                                         | ethylene bromide             | Rest of World   |
| sulfur dichloride production                                        | sulfur dichloride            | Rest of World   |
| nitrous oxide production                                            | nitrous oxide                | Europe          |
| methylcyclohexane production                                        | methylcyclohexane            | Europe          |
| tetrahydrofuran production                                          | tetrahydrofuran              | Europe          |
| ethanolamine production                                             | diethanolamine               | Rest of World   |
| 2-methyl-2-butanol production                                       | 2-methyl-2-butanol           | Rest of World   |
| ethanolamine production                                             | diethanolamine               | Europe          |
| dimethyl malonate production                                        | dimethyl malonate            | Europe          |
| adipic acid production                                              | succinic acid                | Rest of World   |
| chichibabin amination                                               | aminopyridine                | Europe          |

|                                                                  |                                           |               |
|------------------------------------------------------------------|-------------------------------------------|---------------|
| manganese sulfate production                                     | manganese sulfate                         | Global        |
| acrylonitrile-butadiene-styrene copolymer production             | acrylonitrile-butadiene-styrene copolymer | Europe        |
| ethanolamine production                                          | triethanolamine                           | Europe        |
| napropamide production                                           | napropamide                               | Europe        |
| trimethylamine production                                        | trimethylamine                            | Europe        |
| azodicarbonamide production                                      | azodicarbonamide                          | Europe        |
| butyldiglycol acetate production                                 | butyldiglycol acetate                     | Global        |
| barium hydroxide production                                      | barium hydroxide                          | Global        |
| acetaldehyde production                                          | acetaldehyde                              | Rest of World |
| tert-butyl amine production                                      | tert-butyl amine                          | Rest of World |
| chlorodifluoromethane production                                 | chlorodifluoromethane                     | Netherlands   |
| propanal production                                              | propanal                                  | Europe        |
| benzal chloride production                                       | benzal chloride                           | Rest of World |
| benzyl chloride production                                       | benzyl chloride                           | Rest of World |
| azodicarbonamide production                                      | azodicarbonamide                          | Rest of World |
| ethyl tert-butyl ether production, from bioethanol               | ethyl tert-butyl ether                    | Rest of World |
| boron trifluoride production                                     | boron trifluoride                         | Global        |
| aluminium hydroxide production                                   | aluminium hydroxide                       | North America |
| phosphorus oxychloride production, from phosphorus pentachloride | phosphorus oxychloride                    | Global        |
| vinyl chloride production                                        | vinyl chloride                            | Rest of World |
| cobalt sulfate production                                        | cobalt sulfate                            | China         |
| adipic acid production                                           | adipic acid                               | Europe        |
| butyl acetate production                                         | butyl acetate                             | Rest of World |
| soda production, solvay process                                  | sodium bicarbonate                        | Europe        |
| o-aminophenol production                                         | o-aminophenol                             | Europe        |
| oxalic acid production                                           | oxalic acid                               | China         |
| lithium fluoride production                                      | lithium fluoride                          | Rest of World |
| lithium hydroxide production                                     | lithium hydroxide                         | Global        |
| 2-nitroaniline production                                        | 2-nitroaniline                            | Europe        |
| dodecanol production, ziegler process                            | dodecanol                                 | Global        |
| aluminium hydroxide production                                   | aluminium hydroxide                       | Rest of World |
| methylcyclohexane production                                     | methylcyclohexane                         | Rest of World |
| acrolein production                                              | acrolein                                  | Rest of World |
| chlorine dioxide production                                      | chlorine dioxide                          | Europe        |
| benzene chlorination                                             | o-dichlorobenzene                         | Rest of World |
| butane-1,4-diol production                                       | butane-1,4-diol                           | Rest of World |
| phenyl acetic acid production                                    | phenyl acetic acid                        | Rest of World |
| strontium carbonate production                                   | strontium carbonate                       | Global        |
| aluminium fluoride production                                    | aluminium fluoride                        | Rest of World |
| benzyl chloride production                                       | benzyl chloride                           | Europe        |
| 1-propanol production                                            | 1-propanol                                | Rest of World |
| calcium ammonium nitrate production                              | calcium ammonium nitrate                  | Rest of World |
| zinc monosulfate production                                      | zinc monosulfate                          | Europe        |
| maleic anhydride production by catalytic oxidation of benzene    | maleic anhydride                          | Europe        |
| ethylene glycol production                                       | triethylene glycol                        | Rest of World |
| epichlorohydrin production from allyl chloride                   | epichlorohydrin                           | Europe        |
| ethephon production                                              | ethylene dichloride                       | Global        |
| phenolic resin production                                        | phenolic resin                            | Rest of World |
| sodium amide production                                          | sodium amide                              | Rest of World |
| ethyl acetate production                                         | ethyl acetate                             | Rest of World |
| silicon production, solar grade, modified Siemens process        | silicon, solar grade                      | Rest of World |
| soda production, solvay process                                  | soda ash, light                           | Rest of World |
| 4-tert-butylbenzaldehyde production                              | 4-tert-butylbenzaldehyde                  | Rest of World |

|                                                            |                                       |                                                                           |
|------------------------------------------------------------|---------------------------------------|---------------------------------------------------------------------------|
| lauric diethanolamide production                           | lauric diethanolamide                 | Global                                                                    |
| cyanogen chloride production                               | cyanogen chloride                     | Rest of World                                                             |
| bromopropane production                                    | bromopropane                          | Europe                                                                    |
| sodium amide production                                    | sodium amide                          | Europe                                                                    |
| tetrafluoroethylene production                             | tetrafluoroethylene                   | Rest of World                                                             |
| sodium dithionite production, anhydrous                    | sodium dithionite, anhydrous          | Rest of World                                                             |
| sodium perchlorate production                              | sodium perchlorate                    | Global                                                                    |
| cyanogen chloride production                               | cyanogen chloride                     | Europe                                                                    |
| butyl acrylate production                                  | butyl acrylate                        | Europe                                                                    |
| sodium chloroacetate production                            | sodium chloroacetate                  | Global                                                                    |
| prosulfocarb production                                    | prosulfocarb                          | Rest of World                                                             |
| chichibabin amination                                      | aminopyridine                         | Rest of World                                                             |
| ethylenediamine production, from ethylene dichloride       | ethylenediamine                       | Rest of World                                                             |
| vinyl acetate production                                   | vinyl acetate                         | Europe                                                                    |
| sodium sulfate production, from natural sources            | sodium sulfate, anhydrite             | Rest of World                                                             |
| ammonium nitrite production                                | ammonium nitrite                      | Rest of World                                                             |
| titanium dioxide production, sulfate process               | titanium dioxide                      | Europe                                                                    |
| glyphosate production                                      | glyphosate                            | Europe                                                                    |
| polysulfone production, for membrane filtration production | polysulfone                           | Global                                                                    |
| styrene production                                         | styrene                               | Rest of World                                                             |
| Sohio process                                              | acetonitrile                          | Europe                                                                    |
| Brown-Schlesinger process                                  | sodium tetrahydridoborate             | Global                                                                    |
| ethanolamine production                                    | monoethanolamine                      | Europe                                                                    |
| resorcinol production, benzene disulfonation               | resorcinol                            | Germany                                                                   |
| metolachlor production                                     | metolachlor                           | Europe                                                                    |
| glyphosate production                                      | glyphosate                            | Rest of World                                                             |
| dipropylene glycol monomethyl ether production             | dipropylene glycol monomethyl ether   | Europe                                                                    |
| hydroformylation of butene                                 | 3-methyl-1-butanol                    | Rest of World                                                             |
| hydroformylation of propylene                              | isobutanol                            | Rest of World                                                             |
| hydroquinone production                                    | hydroquinone                          | Rest of World                                                             |
| calcium nitrate production                                 | calcium nitrate                       | Rest of World                                                             |
| diammonium phosphate production                            | diammonium phosphate                  | China                                                                     |
| phenyl isocyanate production                               | phenyl isocyanate                     | Europe                                                                    |
| hexamethylenediamine production                            | hexamethylenediamine                  | Rest of World                                                             |
| isopropyl acetate production                               | isopropyl acetate                     | Europe                                                                    |
| manganese dioxide production                               | manganese dioxide                     | Global                                                                    |
| vinyl acetate production                                   | vinyl acetate                         | Rest of World                                                             |
| aluminium hydroxide production                             | aluminium hydroxide                   | China                                                                     |
| titanium dioxide production, chloride process              | titanium dioxide                      | Rest of World                                                             |
| potassium perchlorate production                           | potassium perchlorate                 | Global                                                                    |
| aluminium hydroxide production                             | aluminium hydroxide                   | International Aluminium Institute producing area, EU27 and EFTA countries |
| phosphorus pentachloride production                        | phosphorus pentachloride              | Rest of World                                                             |
| ethanolamine production                                    | monoethanolamine                      | Rest of World                                                             |
| EDTA, ethylenediaminetetraacetic acid production           | EDTA, ethylenediaminetetraacetic acid | Rest of World                                                             |
| 2-butanol production by hydration of butene                | butane                                | Europe                                                                    |
| orbencarb production                                       | orbencarb                             | Rest of World                                                             |
| sodium silver thiosulfate production                       | sodium silver thiosulfate             | Global                                                                    |

|                                                                        |                                                             |                |
|------------------------------------------------------------------------|-------------------------------------------------------------|----------------|
| acetone cyanohydrin production                                         | acetone cyanohydrin                                         | Europe         |
| napropamide production                                                 | napropamide                                                 | Rest of World  |
| dipropyl amine production                                              | dipropyl amine                                              | Europe         |
| sodium pyrophosphate production                                        | sodium pyrophosphate                                        | Global         |
| sodium oxide production                                                | sodium oxide                                                | Europe         |
| methylchloride production                                              | methylchloride                                              | Western Europe |
| sodium hydrogen sulfite production                                     | sodium hydrogen sulfite                                     | Rest of World  |
| methylamine production                                                 | methylamine                                                 | Rest of World  |
| metaldehyde production                                                 | metaldehyde                                                 | Rest of World  |
| fosetyl-Al production                                                  | fosetyl-Al                                                  | Rest of World  |
| trimethyl borate production                                            | trimethyl borate                                            | Global         |
| benzaldehyde production                                                | benzaldehyde                                                | Rest of World  |
| xylene production                                                      | xylene                                                      | Europe         |
| chloromethyl methyl ether production                                   | chloromethyl methyl ether                                   | Europe         |
| alpha-naphthol production                                              | alpha-naphthol                                              | Europe         |
| silicon production, single crystal, Czochralski process, photovoltaics | silicon, single crystal, Czochralski process, photovoltaics | Rest of World  |
| lithium fluoride production                                            | lithium fluoride                                            | China          |
| sulfuryl chloride production                                           | sulfuryl chloride                                           | Global         |
| strontium carbonate production                                         | sodium sulfide                                              | Global         |
| ascorbic acid production                                               | ascorbic acid                                               | Rest of World  |
| hydroformylation of propylene                                          | 1-butanol                                                   | Europe         |
| silicon tetrachloride production                                       | silicon tetrachloride                                       | Global         |
| methallylchloride production                                           | methallylchloride                                           | Global         |
| alpha-picoline production                                              | alpha-picoline                                              | Rest of World  |
| toluene diisocyanate production                                        | toluene diisocyanate                                        | Rest of World  |
| metolachlor production                                                 | metolachlor                                                 | Rest of World  |
| fluorination of sodium tetrahydridoborate                              | sodium tetrafluoroborate                                    | Global         |
| 4-methyl-2-pentanone production                                        | 4-methyl-2-pentanone                                        | Europe         |
| 2-butanol production by hydration of butene                            | 2-butanol                                                   | Rest of World  |
| piperidine production                                                  | piperidine                                                  | Rest of World  |
| phosphorus pentachloride production                                    | phosphorus pentachloride                                    | China          |
| zirconium oxide production                                             | zirconium oxide                                             | Australia      |
| stearic acid production                                                | stearic acid                                                | Global         |
| Sohio process                                                          | acrylonitrile                                               | Rest of World  |
| lithium hexafluorophosphate production                                 | lithium hexafluorophosphate                                 | China          |
| acrylic acid production                                                | acrylic acid                                                | Europe         |
| daminozide production                                                  | daminozide                                                  | Global         |
| lithium iron phosphate production, solid state process                 | lithium iron phosphate                                      | Rest of World  |
| methyl acrylate production                                             | methyl acrylate                                             | Global         |
| sodium hydrosulfide production                                         | sodium hydrosulfide                                         | Europe         |
| glycine production                                                     | glycine                                                     | Rest of World  |
| methylene diphenyl diisocyanate production                             | methylene diphenyl diisocyanate                             | Rest of World  |
| ethanolamine production                                                | triethanolamine                                             | Rest of World  |
| 3-methylpyridine production                                            | 3-methylpyridine                                            | Europe         |
| lithium chloride production                                            | lithium chloride                                            | Global         |
| 1-propanol production                                                  | 1-propanol                                                  | Europe         |
| sodium oxide production                                                | sodium oxide                                                | Rest of World  |
| 4-tert-butyltoluene production                                         | 4-tert-butyltoluene                                         | Europe         |
| vinyl carbonate production                                             | vinyl carbonate                                             | Global         |
| urea production                                                        | urea                                                        | North America  |
| dipropylene glycol monomethyl ether production                         | dipropylene glycol monomethyl ether                         | Rest of World  |
| cyanuric chloride production                                           | cyanuric chloride                                           | Global         |
| polycarbonate production                                               | polycarbonate                                               | Europe         |

|                                                               |                                 |                               |
|---------------------------------------------------------------|---------------------------------|-------------------------------|
| chloromethyl methyl ether production                          | chloromethyl methyl ether       | Rest of World                 |
| vinyl chloride production                                     | vinyl chloride                  | Europe                        |
| allyl chloride production, reaction of propylene and chlorine | dichloropropene                 | Europe                        |
| ascorbic acid production                                      | ascorbic acid                   | Europe                        |
| lithium carbonate production, from spodumene                  | lithium carbonate               | Rest of World                 |
| propanal production                                           | propanal                        | Rest of World                 |
| resorcinol production, hydrolysis of meta-phenylene diamine   | resorcinol                      | Global                        |
| hydroxylamine production                                      | hydroxylamine                   | Rest of World                 |
| chloridazon production                                        | chloridazon                     | Global                        |
| melamine production                                           | melamine                        | Europe                        |
| potassium hydroxide production                                | hydrogen, liquid                | Europe                        |
| potassium sulfate production                                  | potassium sulfate               | Europe                        |
| zineb production                                              | zineb                           | Global                        |
| decabromodiphenyl ether production                            | decabromodiphenyl ether         | Europe                        |
| isopropanol production                                        | isopropanol                     | Rest of World                 |
| ammonium nitrite production                                   | ammonium nitrite                | Europe                        |
| dioctyl adipate production                                    | dioctyl adipate                 | Global                        |
| dimethyl sulfate production                                   | dimethyl sulfate                | Rest of World                 |
| sodium hydrogen sulfate production                            | sodium hydrogen sulfate         | Global                        |
| aluminium hydroxide production                                | aluminium hydroxide             | United Nations region Oceania |
| methyl methacrylate production                                | methyl methacrylate             | Rest of World                 |
| ethylene glycol monoethyl ether production                    | ethylene glycol monoethyl ether | Rest of World                 |
| decabromodiphenyl ether production                            | decabromodiphenyl ether         | Rest of World                 |
| ammonium carbonate production                                 | ammonium carbonate              | Europe                        |
| prochloraz production                                         | prochloraz                      | Global                        |
| ammonium chloride production                                  | ammonium chloride               | Global                        |
| Mannheim process                                              | sodium sulfate, anhydrite       | Europe                        |
| benzal chloride production                                    | benzal chloride                 | Europe                        |
| propyl amine production                                       | propyl amine                    | Europe                        |
| aniline production                                            | aniline                         | Rest of World                 |
| heavy water production                                        | heavy water                     | Canada                        |
| dimethyl ether production                                     | dimethyl ether                  | Rest of World                 |
| chlorothalonil production                                     | chlorothalonil                  | Europe                        |
| sulfur trioxide production                                    | sulfur trioxide                 | Rest of World                 |
| monoammonium phosphate production                             | monoammonium phosphate          | Europe                        |
| captan production                                             | captan                          | Europe                        |
| iodine production                                             | iodine                          | Rest of World                 |
| copper carbonate production                                   | copper carbonate                | Europe                        |
| dimethylamine production                                      | dimethylamine                   | Europe                        |
| urea production                                               | urea                            | China                         |
| aluminium chloride production                                 | aluminium chloride              | Global                        |
| dioxane production                                            | dioxane                         | Europe                        |
| methacrylic acid production                                   | methacrylic acid                | Europe                        |
| cumene production                                             | cumene                          | Rest of World                 |
| p-nitrotoluene production                                     | p-nitrotoluene                  | Europe                        |
| epichlorohydrin production from allyl chloride                | trichloropropane                | Europe                        |
| Mannheim process                                              | sodium sulfate, anhydrite       | Rest of World                 |
| decarboxylative cyclization of adipic acid                    | formic acid                     | Rest of World                 |
| disodium disulphite production                                | disodium disulphite             | Global                        |
| paclobutrazol production                                      | paclobutrazol                   | Global                        |
| phenyl isocyanate production                                  | phenyl isocyanate               | Rest of World                 |
| propyl amine production                                       | propyl amine                    | Rest of World                 |
| 2,4-dichlorotoluene production                                | 2,4-dichlorotoluene             | Europe                        |

|                                                         |                               |               |
|---------------------------------------------------------|-------------------------------|---------------|
| ethyl tert-butyl ether production, from bioethanol      | ethyl tert-butyl ether        | Europe        |
| phthalimide production                                  | phthalimide                   | Rest of World |
| trichloroborane production                              | trichloroborane               | Global        |
| phenyl acetic acid production                           | phenyl acetic acid            | Europe        |
| chloroacetic acid production                            | chloroacetic acid             | Europe        |
| butyl acetate production                                | butyl acetate                 | Europe        |
| triethyl amine production                               | triethyl amine                | Europe        |
| benzaldehyde production                                 | benzaldehyde                  | Europe        |
| polybutadiene production                                | polybutadiene                 | Rest of World |
| ammonium sulfate production                             | ammonium sulfate              | Rest of World |
| octabenzene production                                  | octabenzene                   | Global        |
| ethylene glycol production                              | diethylene glycol             | Europe        |
| isopropanol production                                  | isopropanol                   | Europe        |
| p-nitrophenol production                                | p-nitrophenol                 | Europe        |
| acetyl chloride production                              | acetyl chloride               | Europe        |
| chloroacetyl chloride production                        | chloroacetyl chloride         | Rest of World |
| dioctyl terephthalate production                        | dioctyl terephthalate         | Global        |
| o-nitrophenol production                                | o-nitrophenol                 | Europe        |
| dimethyl carbonate production                           | dimethyl carbonate            | Rest of World |
| ethyl benzene production                                | ethyl benzene                 | Europe        |
| fosetyl-Al production                                   | sodium nitrate                | Rest of World |
| cumene production                                       | cumene                        | Europe        |
| dimethyl sulfide production                             | dimethyl sulfide              | Europe        |
| p-chlorophenol production                               | p-chlorophenol                | Europe        |
| titanium dioxide production, chloride process           | titanium dioxide              | Europe        |
| soda production, solvay process                         | soda ash, light               | Europe        |
| sodium phosphate production                             | sodium phosphate              | Europe        |
| carbon disulfide production, from charcoal              | carbon disulfide              | Global        |
| boric oxide production                                  | boric oxide                   | Global        |
| potassium hydroxide production                          | potassium hydroxide           | Europe        |
| cyclohexanol production                                 | cyclohexanol                  | Rest of World |
| ethylene glycol diethyl ether production                | ethylene glycol diethyl ether | Europe        |
| ethephon production                                     | ethephon                      | Global        |
| sodium dichromate production                            | sodium dichromate             | Europe        |
| benzene chlorination                                    | p-dichlorobenzene             | Europe        |
| sodium tripolyphosphate production                      | sodium tripolyphosphate       | Rest of World |
| dimethylaminopropylamine production                     | dimethylaminopropylamine      | Europe        |
| ethyl acetate production                                | ethyl acetate                 | Europe        |
| isoproturon production                                  | isoproturon                   | Rest of World |
| styrene production                                      | styrene                       | Europe        |
| boron carbide production                                | boron carbide                 | Global        |
| copper oxide production                                 | copper oxide                  | Europe        |
| chlorine dioxide production                             | chlorine dioxide              | Rest of World |
| benzene chlorination                                    | o-dichlorobenzene             | Europe        |
| methyl iodide production                                | methyl iodide                 | Europe        |
| lithium carbonate production, from spodumene            | lithium carbonate             | China         |
| hydrogen cyanide production                             | hydrogen cyanide              | Rest of World |
| pentaerythritol production in sodium hydroxide solution | sodium formate                | Rest of World |
| polybutadiene production                                | polybutadiene                 | Europe        |
| triethyl amine production                               | triethyl amine                | Rest of World |
| toluene oxidation                                       | benzoic acid                  | Europe        |
| amidosulfuron production                                | amidosulfuron                 | Global        |
| metamitron production                                   | metamitron                    | Rest of World |
| 2,4-dichlorophenol production                           | 2,4-dichlorophenol            | Rest of World |
| ammonium nitrate phosphate production                   | ammonium nitrate phosphate    | Europe        |

|                                                           |                                 |                                                                                           |
|-----------------------------------------------------------|---------------------------------|-------------------------------------------------------------------------------------------|
| acetone cyanohydrin production                            | acetone cyanohydrin             | Rest of World                                                                             |
| dehydrogenation of butan-1,4-diol                         | butyrolactone                   | Rest of World                                                                             |
| dimethyl carbonate production                             | formaldehyde                    | Rest of World                                                                             |
| potassium mining and beneficiation                        | potassium chloride              | Canada-Saskatchewan                                                                       |
| hydroformylation of butene                                | 1-pentanol                      | Europe                                                                                    |
| hydroformylation of butene                                | 2-methyl-1-butanol              | Europe                                                                                    |
| lithium carbonate production, from concentrated brine     | lithium carbonate               | Global                                                                                    |
| fibre production, viscose                                 | sulfuric acid                   | Global                                                                                    |
| indium production                                         | indium                          | Europe                                                                                    |
| 2,6-di-tert-butylphenol production                        | 2,6-di-tert-butylphenol         | Global                                                                                    |
| vinyl fluoride production                                 | vinyl fluoride                  | Rest of World                                                                             |
| maleic hydrazide production                               | maleic hydrazide                | Global                                                                                    |
| hydroquinone production                                   | hydroquinone                    | Europe                                                                                    |
| aluminium hydroxide production                            | aluminium hydroxide             | International Aluminium Institute producing area, Russia and Europe outside EU27 and EFTA |
| hydroformylation of butene                                | 1-pentanol                      | Rest of World                                                                             |
| propyl acetate production                                 | isopropyl acetate               | Rest of World                                                                             |
| isohexane production                                      | isohexane                       | Europe                                                                                    |
| sulfamic acid production                                  | sulfamic acid                   | Global                                                                                    |
| urea formaldehyde resin production                        | urea formaldehyde resin         | Rest of World                                                                             |
| pentaerythritol production in sodium hydroxide solution   | pentaerythritol                 | Rest of World                                                                             |
| isopropylamine production                                 | isopropylamine                  | Rest of World                                                                             |
| dimethylamine production                                  | dimethylamine                   | Rest of World                                                                             |
| nylon 6 production                                        | nylon 6                         | Europe                                                                                    |
| helium purification                                       | helium                          | Global                                                                                    |
| calcium carbonate production, precipitated                | calcium carbonate, precipitated | Rest of World                                                                             |
| vinyl fluoride production                                 | vinyl fluoride                  | United States of America                                                                  |
| silicon production, solar grade, modified Siemens process | silicon, solar grade            | Europe                                                                                    |
| ethylene glycol production                                | ethylene glycol                 | Europe                                                                                    |
| glycerine production, from epichlorohydrin                | glycerine                       | Europe                                                                                    |
| sulfur dichloride production                              | sulfur dichloride               | Europe                                                                                    |
| naphthalene sulfonic acid production                      | naphthalene sulfonic acid       | Europe                                                                                    |
| urea formaldehyde resin production                        | urea formaldehyde resin         | Europe                                                                                    |
| dimethyl sulfoxide production                             | dimethyl sulfoxide              | Europe                                                                                    |
| phosphorous chloride production                           | phosphorous chloride            | Rest of World                                                                             |
| salicylic acid production                                 | salicylic acid                  | Global                                                                                    |
| silicon hydrochloration                                   | silicon tetrahydride            | Global                                                                                    |
| 4-tert-butyltoluene production                            | 4-tert-butyltoluene             | Rest of World                                                                             |
| chloronitrobenzene production                             | chloronitrobenzene              | Rest of World                                                                             |
| monoammonium phosphate production                         | monoammonium phosphate          | North America                                                                             |
| aluminium hydroxide production                            | aluminium hydroxide             | International Aluminium Institute producing area, South America                           |
| benzene chlorination                                      | p-dichlorobenzene               | Rest of World                                                                             |
| calcium carbonate production, precipitated                | calcium carbonate, precipitated | Europe                                                                                    |
| mecoprop production                                       | mecoprop                        | Rest of World                                                                             |
| acrolein production                                       | acrolein                        | Europe                                                                                    |



|                                                                           |                                                         |               |
|---------------------------------------------------------------------------|---------------------------------------------------------|---------------|
| Mannheim process                                                          | hydrochloric acid, without water, in 30% solution state | Rest of World |
| alkyl sulphate (C12-14) production                                        | alkyl sulphate (C12-14)                                 | Global        |
| sodium nitrite production                                                 | sodium nitrite                                          | Europe        |
| diammonium phosphate production                                           | diammonium phosphate                                    | North America |
| acetoacetic acid production                                               | acetoacetic acid                                        | Rest of World |
| zinc monosulfate production                                               | zinc monosulfate                                        | Rest of World |
| tebuconazole production                                                   | tebuconazole                                            | Global        |
| dimethyl carbonate production                                             | dimethyl carbonate                                      | Europe        |
| barium carbonate production                                               | barium carbonate                                        | Global        |
| sodium chlorate production, powder                                        | sodium chlorate, powder                                 | Rest of World |
| chlorofluorination of ethylene                                            | monochloropentafluoroethane                             | Global        |
| nylon 6 production                                                        | nylon 6                                                 | Rest of World |
| silicon production, electronics grade                                     | silicon tetrachloride                                   | Germany       |
| aclonifen production                                                      | aclonifen                                               | Rest of World |
| acetaldehyde production                                                   | acetaldehyde                                            | Europe        |
| N-methyl-2-pyrrolidone production                                         | N-methyl-2-pyrrolidone                                  | Rest of World |
| mancozeb production                                                       | mancozeb                                                | Rest of World |
| acetaldehyde oxidation                                                    | acetic anhydride                                        | Rest of World |
| ethylene glycol monoethyl ether production                                | ethylene glycol monoethyl ether                         | Europe        |
| phenol production, from cumene                                            | phenol                                                  | Europe        |
| sodium cumenesulphonate production                                        | sodium cumenesulphonate                                 | Rest of World |
| tetrafluoroethylene production                                            | tetrafluoroethylene                                     | Europe        |
| acetanilide production                                                    | acetanilide                                             | Europe        |
| chloroacetic acid production                                              | chloroacetic acid                                       | Rest of World |
| copper oxide production                                                   | copper oxide                                            | Rest of World |
| xylene production                                                         | xylene                                                  | Rest of World |
| sodium sulfite production                                                 | sodium sulfite                                          | Rest of World |
| trichloroacetic acid production                                           | trichloroacetic acid                                    | Rest of World |
| methyl methacrylate production                                            | methyl methacrylate                                     | Europe        |
| potassium chloride production                                             | potassium chloride                                      | Rest of World |
| fosetyl-Al production                                                     | fosetyl-Al                                              | Europe        |
| adipic acid production                                                    | succinic acid                                           | Europe        |
| 6-benzyladenine production                                                | 6-benzyladenine                                         | Global        |
| dimethylacetamide production                                              | dimethylacetamide                                       | Global        |
| ammonium nitrate phosphate production                                     | ammonium nitrate phosphate                              | China         |
| melamine production                                                       | melamine                                                | Rest of World |
| methyl iodide production                                                  | methyl iodide                                           | Rest of World |
| chloronitrobenzene production                                             | chloronitrobenzene                                      | Europe        |
| captan production                                                         | captan                                                  | Rest of World |
| metazachlor production                                                    | metazachlor                                             | Global        |
| barium oxide production                                                   | barium oxide                                            | Global        |
| hydrochloric acid production, from the reaction of hydrogen with chlorine | hydrochloric acid, without water, in 30% solution state | Rest of World |
| sodium chlorate production, powder                                        | sodium chlorate, powder                                 | Europe        |
| allyl chloride production, reaction of propylene and chlorine             | allyl chloride                                          | Europe        |
| glycerine production, from epichlorohydrin                                | glycerine                                               | Rest of World |
| sodium sulfide production                                                 | sodium sulfide                                          | Global        |
| N-methyl-2-pyrrolidone production                                         | N-methyl-2-pyrrolidone                                  | Europe        |
| oxidation of methanol                                                     | formaldehyde                                            | Rest of World |
| bromine production                                                        | bromine                                                 | Europe        |
| epichlorohydrin production from allyl chloride                            | trichloropropane                                        | Rest of World |
| sodium nitrate production                                                 | sodium nitrate                                          | Europe        |
| methyl ethyl ketone production                                            | methyl ethyl ketone                                     | Rest of World |
| potassium chloride production                                             | potassium chloride                                      | Europe        |

|                                                                                                |                                                                         |                          |
|------------------------------------------------------------------------------------------------|-------------------------------------------------------------------------|--------------------------|
| succinic acid production                                                                       | succinic acid                                                           | Global                   |
| phosphorous chloride production                                                                | phosphorous chloride                                                    | Europe                   |
| chichibabin pyridine synthesis                                                                 | pyridine                                                                | Europe                   |
| mepiquat chloride production                                                                   | mepiquat chloride                                                       | Global                   |
| naphthalene sulfonic acid production                                                           | naphthalene sulfonic acid                                               | Rest of World            |
| modified Solvay process, Hou's process                                                         | ammonium chloride                                                       | Global                   |
| propyl acetate production                                                                      | isopropyl acetate                                                       | Europe                   |
| benzene chlorination                                                                           | monochlorobenzene                                                       | Rest of World            |
| propionic acid production                                                                      | propionic acid                                                          | Rest of World            |
| oxalic acid production                                                                         | oxalic acid                                                             | Rest of World            |
| indium production                                                                              | indium                                                                  | Rest of World            |
| vinyl fluoride production                                                                      | hydrogen fluoride                                                       | Rest of World            |
| styrene-acrylonitrile copolymer production                                                     | styrene-acrylonitrile copolymer                                         | Europe                   |
| Sohio process                                                                                  | acetonitrile                                                            | Rest of World            |
| tetrachloroethylene production                                                                 | tetrachloroethylene                                                     | Western Europe           |
| o-chlorotoluene production                                                                     | o-chlorotoluene                                                         | Europe                   |
| oxidation of methanol                                                                          | formaldehyde                                                            | Europe                   |
| isopropylamine production                                                                      | isopropylamine                                                          | Europe                   |
| soda production, solvay process                                                                | sodium bicarbonate                                                      | Rest of World            |
| acetoacetic acid production                                                                    | acetoacetic acid                                                        | Europe                   |
| o-chlorobenzaldehyde production                                                                | o-chlorobenzaldehyde                                                    | Rest of World            |
| trimesoyl chloride production, for membrane filtration production                              | trimesoyl chloride                                                      | Global                   |
| nickel sulfate production                                                                      | nickel sulfate                                                          | Global                   |
| sulfur trioxide production                                                                     | sulfur trioxide                                                         | Europe                   |
| dimethylaminopropylamine production                                                            | dimethylaminopropylamine                                                | Rest of World            |
| toluene diisocyanate production                                                                | toluene diisocyanate                                                    | Europe                   |
| amination of chlorosilane                                                                      | ammonium chloride                                                       | Global                   |
| isopropyl acetate production                                                                   | isopropyl acetate                                                       | Rest of World            |
| morpholine production                                                                          | morpholine                                                              | Global                   |
| o-cresol production                                                                            | o-cresol                                                                | Rest of World            |
| ethylene glycol production                                                                     | triethylene glycol                                                      | Europe                   |
| selenium production                                                                            | selenium                                                                | Rest of World            |
| purification of wet-process phosphoric acid to industrial grade, product in 85% solution state | phosphoric acid, industrial grade, without water, in 85% solution state | Rest of World            |
| formic acid production, methyl formate route                                                   | formic acid                                                             | Europe                   |
| p-chlorophenol production                                                                      | p-chlorophenol                                                          | Rest of World            |
| chlorodifluoromethane production                                                               | chlorodifluoromethane                                                   | Rest of World            |
| 4-methyl-2-pentanone production                                                                | 4-methyl-2-pentanone                                                    | Rest of World            |
| calcium nitrate production                                                                     | ammonium nitrate                                                        | Rest of World            |
| hydrazine production                                                                           | hydrazine                                                               | Europe                   |
| electrolysis of lithium chloride                                                               | lithium                                                                 | Global                   |
| sodium ethyl xanthate production                                                               | sodium ethyl xanthate                                                   | Rest of World            |
| hydroformylation of butene                                                                     | 3-methyl-1-butanol                                                      | Europe                   |
| cadmium telluride production, semiconductor-grade                                              | cadmium telluride, semiconductor-grade                                  | United States of America |
| sodium cumenesulphonate production                                                             | sodium cumenesulphonate                                                 | Europe                   |
| 2-pyridinol production                                                                         | 2-pyridinol                                                             | Rest of World            |
| chlorothalonil production                                                                      | chlorothalonil                                                          | Rest of World            |
| prosulfocarb production                                                                        | prosulfocarb                                                            | Europe                   |
| resorcinol production, benzene disulfonation                                                   | sodium sulfite                                                          | Germany                  |
| cobalt sulfate production                                                                      | cobalt sulfate                                                          | Rest of World            |
| sodium hypochlorite production, product in 15% solution state                                  | sodium hypochlorite, without water, in 15% solution state               | Canada-Quebec            |
| ethylene carbonate production                                                                  | ethylene carbonate                                                      | Rest of World            |

|                                                                        |                                                             |                                                                                      |
|------------------------------------------------------------------------|-------------------------------------------------------------|--------------------------------------------------------------------------------------|
| cyclohexanol production                                                | cyclohexanol                                                | Europe                                                                               |
| hydrogen fluoride production                                           | hydrogen fluoride                                           | Rest of World                                                                        |
| dimethyldichlorosilane production                                      | dimethyldichlorosilane                                      | Global                                                                               |
| epichlorohydrin production from allyl chloride                         | calcium chloride                                            | Europe                                                                               |
| hydrazine production                                                   | hydrazine                                                   | Rest of World                                                                        |
| formic acid production, methyl formate route                           | formic acid                                                 | Rest of World                                                                        |
| ethylene glycol dimethyl ether production                              | ethylene glycol dimethyl ether                              | Europe                                                                               |
| 1-methoxy-2-propanol production                                        | 1-methoxy-2-propanol                                        | Global                                                                               |
| ammonium carbonate production                                          | ammonium carbonate                                          | Rest of World                                                                        |
| hexamethylenediamine production                                        | hexamethylenediamine                                        | Europe                                                                               |
| sodium phosphate production                                            | sodium phosphate                                            | Rest of World                                                                        |
| atrazine production                                                    | atrazine                                                    | Europe                                                                               |
| carbon tetrachloride production                                        | carbon tetrachloride                                        | Rest of World                                                                        |
| monoammonium phosphate production                                      | monoammonium phosphate                                      | Rest of World                                                                        |
| acetyl chloride production                                             | acetyl chloride                                             | Rest of World                                                                        |
| sodium hydrosulfide production                                         | sodium hydrosulfide                                         | Rest of World                                                                        |
| mecoprop production                                                    | mecoprop                                                    | Europe                                                                               |
| 2,4-dichlorotoluene production                                         | 2,4-dichlorotoluene                                         | Rest of World                                                                        |
| trichloroethylene production                                           | hydrochloric acid, without water, in 30% solution state     | Rest of World                                                                        |
| methyl formate production                                              | methyl formate                                              | Europe                                                                               |
| ethylene carbonate production                                          | ethylene carbonate                                          | China                                                                                |
| o-aminophenol production                                               | o-aminophenol                                               | Rest of World                                                                        |
| vinyl fluoride production                                              | hydrogen fluoride                                           | United States of America                                                             |
| phthalimide production                                                 | phthalimide                                                 | Europe                                                                               |
| p-nitrotoluene production                                              | p-nitrotoluene                                              | Rest of World                                                                        |
| aluminium hydroxide production                                         | aluminium hydroxide                                         | International Aluminium Institute producing area, South and East Asia, without China |
| 2-butanol production by hydration of butene                            | butane                                                      | Rest of World                                                                        |
| selenium production                                                    | selenium                                                    | Europe                                                                               |
| lithium sulfate production                                             | lithium sulfate                                             | Global                                                                               |
| ethylene oxide production                                              | ethylene oxide                                              | Europe                                                                               |
| bromine production                                                     | bromine                                                     | Rest of World                                                                        |
| urea production                                                        | urea                                                        | Europe                                                                               |
| imidazole production                                                   | imidazole                                                   | Rest of World                                                                        |
| 2,4-dinitrotoluene production                                          | 2,4-dinitrotoluene                                          | Europe                                                                               |
| copper carbonate production                                            | copper carbonate                                            | Rest of World                                                                        |
| glyoxal production                                                     | glyoxal                                                     | Rest of World                                                                        |
| 2,4-dinitrotoluene production                                          | 2,4-dinitrotoluene                                          | Rest of World                                                                        |
| imidazole production                                                   | imidazole                                                   | Europe                                                                               |
| dinitrogen tetroxide production                                        | dinitrogen tetroxide                                        | Global                                                                               |
| trifluoromethane production                                            | trifluoromethane                                            | Global                                                                               |
| dimethyl sulfate production                                            | dimethyl sulfate                                            | Europe                                                                               |
| ethylenediamine production, from ethylene dichloride                   | ethylenediamine                                             | Europe                                                                               |
| o-nitrophenol production                                               | o-nitrophenol                                               | Rest of World                                                                        |
| ammonium nitrate phosphate production                                  | ammonium nitrate phosphate                                  | Rest of World                                                                        |
| silicon production, single crystal, Czochralski process, photovoltaics | silicon, single crystal, Czochralski process, photovoltaics | Europe                                                                               |
| manganese(III) oxide production                                        | manganese(III) oxide                                        | China                                                                                |
| p-nitrophenol production                                               | p-nitrophenol                                               | Rest of World                                                                        |

|                                                                           |                                                           |               |
|---------------------------------------------------------------------------|-----------------------------------------------------------|---------------|
| ethylamine production                                                     | ethylamine                                                | Europe        |
| manganese dioxide production                                              | manganese sulfate                                         | Global        |
| sodium ethyl xanthate production                                          | sodium ethyl xanthate                                     | South Africa  |
| 2-butanol production by hydration of butene                               | 2-butanol                                                 | Europe        |
| dimethyl ether production                                                 | dimethyl ether                                            | Europe        |
| ammonium nitrate phosphate production                                     | ammonium nitrate phosphate                                | North America |
| potassium sulfate production                                              | potassium sulfate                                         | Rest of World |
| ethylene glycol production                                                | diethylene glycol                                         | Rest of World |
| piperidine production                                                     | piperidine                                                | Europe        |
| cyclohexanone production                                                  | cyclohexanone                                             | Rest of World |
| sodium hypochlorite production, product in 15% solution state             | sodium hypochlorite, without water, in 15% solution state | Rest of World |
| allyl chloride production, reaction of propylene and chlorine             | allyl chloride                                            | Rest of World |
| amination of chlorosilane                                                 | hexamethyldisilazane                                      | Global        |
| folpet production                                                         | folpet                                                    | Rest of World |
| anthranilic acid production                                               | anthranilic acid                                          | Rest of World |
| nitrobenzene production                                                   | nitrobenzene                                              | Rest of World |
| isobutyl acetate production                                               | isobutyl acetate                                          | Rest of World |
| manganese(III) oxide production                                           | manganese(III) oxide                                      | Rest of World |
| polycarbonate production                                                  | polycarbonate                                             | Rest of World |
| ethylene glycol diethyl ether production                                  | ethylene glycol diethyl ether                             | Rest of World |
| cyclohexane production                                                    | cyclohexane                                               | Rest of World |
| cyclohexane production                                                    | cyclohexane                                               | Europe        |
| cadmium telluride production, semiconductor-grade                         | cadmium telluride, semiconductor-grade                    | Rest of World |
| silicon production, electronics grade                                     | silicon, solar grade                                      | Germany       |
| maneb production                                                          | maneb                                                     | Global        |
| soda production, solvay process                                           | calcium chloride                                          | Rest of World |
| epichlorohydrin production from allyl chloride                            | calcium chloride                                          | Rest of World |
| fosetyl-Al production                                                     | sodium nitrate                                            | Europe        |
| alpha-picoline production                                                 | alpha-picoline                                            | Europe        |
| chloroacetyl chloride production                                          | chloroacetyl chloride                                     | Europe        |
| methylene diphenyl diisocyanate production                                | methylene diphenyl diisocyanate                           | Europe        |
| dimethyl sulfide production                                               | dimethyl sulfide                                          | Rest of World |
| methyl formate production                                                 | methyl formate                                            | Rest of World |
| adipic acid production                                                    | adipic acid                                               | Rest of World |
| 2-pyridinol production                                                    | 2-pyridinol                                               | Europe        |
| dimethyl carbonate production                                             | formaldehyde                                              | Europe        |
| copper sulfate production                                                 | copper sulfate                                            | Global        |
| pyrazole production                                                       | pyrazole                                                  | Rest of World |
| metamitron production                                                     | metamitron                                                | Europe        |
| hydroformylation of butene                                                | 2-methyl-1-butanol                                        | Rest of World |
| cyanoacetic acid production                                               | cyanoacetic acid                                          | Europe        |
| calcium nitrate production                                                | ammonium nitrate                                          | Europe        |
| hydrogen fluoride production                                              | hydrogen fluoride                                         | Europe        |
| methyl ethyl ketone production                                            | methyl ethyl ketone                                       | Europe        |
| benzyl alcohol production                                                 | benzyl alcohol                                            | Rest of World |
| iodine production                                                         | iodine                                                    | Europe        |
| dipropyl amine production                                                 | dipropyl amine                                            | Rest of World |
| hydrochloric acid production, from the reaction of hydrogen with chlorine | hydrochloric acid, without water, in 30% solution state   | Canada-Quebec |
| sodium chlorate production, powder                                        | sodium chlorate, powder                                   | Canada-Quebec |
| sodium fluoride production                                                | sodium fluoride                                           | Global        |
| acrylonitrile-butadiene-styrene copolymer production                      | acrylonitrile-butadiene-styrene copolymer                 | Rest of World |

|                                                                |                                                           |               |
|----------------------------------------------------------------|-----------------------------------------------------------|---------------|
| Brown-Schlesinger process                                      | sodium methoxide                                          | Global        |
| phosphorus oxychloride production, from phosphorus trichloride | phosphorus oxychloride                                    | Europe        |
| hydrogen cyanide production                                    | hydrogen cyanide                                          | Europe        |
| silicon production, electronics grade                          | silicon, solar grade                                      | Rest of World |
| trichloroethylene production                                   | trichloroethylene                                         | Europe        |
| lactic acid production                                         | lactic acid                                               | Europe        |
| dodecanol production, from coconut oil                         | dodecanol                                                 | Global        |
| potassium hydroxide production                                 | chlorine, gaseous                                         | Rest of World |
| metaldehyde production                                         | metaldehyde                                               | Europe        |
| stearic acid production                                        | glycerine                                                 | Global        |
| acrylic acid production                                        | acrylic acid                                              | Rest of World |
| bromoxynil production                                          | bromoxynil                                                | Global        |
| acetylene production                                           | acetylene                                                 | Europe        |
| sodium cyanide production                                      | sodium cyanide                                            | Rest of World |
| calcium nitrate production                                     | calcium nitrate                                           | Europe        |
| o-chlorobenzaldehyde production                                | o-chlorobenzaldehyde                                      | Europe        |
| triphenyl phosphate production                                 | triphenyl phosphate                                       | Global        |
| diammonium phosphate production                                | diammonium phosphate                                      | Europe        |
| dimethyl hexynediol production                                 | dimethyl hexynediol                                       | Global        |
| salicylic acid production                                      | phenol                                                    | Global        |
| atrazine production                                            | atrazine                                                  | Rest of World |
| sodium tripolyphosphate production                             | sodium tripolyphosphate                                   | Europe        |
| fluazifop-butyl production                                     | fluazifop-butyl                                           | Global        |
| dioxane production                                             | dioxane                                                   | Rest of World |
| potassium hydroxide production                                 | potassium hydroxide                                       | Rest of World |
| diammonium phosphate production                                | diammonium phosphate                                      | Rest of World |
| chlorotoluron production                                       | chlorotoluron                                             | Europe        |
| monoammonium phosphate production                              | monoammonium phosphate                                    | China         |
| 2,4-di-tert-butylphenol production                             | 2,4-di-tert-butylphenol                                   | Global        |
| trifluoroacetic acid production                                | trifluoroacetic acid                                      | Europe        |
| dimethylamine borane production                                | dimethylamine borane                                      | Global        |
| methylchloride production                                      | methylchloride                                            | Rest of World |
| ethylene oxide production                                      | ethylene oxide                                            | Rest of World |
| chloropropionic acid production                                | chloropropionic acid                                      | Rest of World |
| soda production, solvay process                                | calcium chloride                                          | Europe        |
| chlormequat chloride production                                | chlormequat chloride                                      | Global        |
| hydrazine sulfate production                                   | hydrazine sulfate                                         | Global        |
| o-chlorotoluene production                                     | o-chlorotoluene                                           | Rest of World |
| dichloromethane production                                     | dichloromethane                                           | Europe        |
| nitrous oxide production                                       | nitrous oxide                                             | Rest of World |
| pyrazole production                                            | pyrazole                                                  | Europe        |
| thionyl chloride production                                    | thionyl chloride                                          | Europe        |
| 2-methyl-2-butanol production                                  | 2-methyl-2-butanol                                        | Europe        |
| adiponitrile production                                        | adiponitrile                                              | Rest of World |
| sodium sulfate production, from natural sources                | sodium sulfate, anhydrite                                 | Europe        |
| sodium hypochlorite production, product in 15% solution state  | sodium hypochlorite, without water, in 15% solution state | Europe        |
| sodium sulfite production                                      | sodium sulfite                                            | Europe        |
| silicon production, electronics grade                          | silicon, electronics grade                                | Rest of World |
| styrene-acrylonitrile copolymer production                     | styrene-acrylonitrile copolymer                           | Rest of World |
| tetrachloroethylene production                                 | tetrachloroethylene                                       | Rest of World |
| phosphane production                                           | phosphane                                                 | Global        |
| tris(2,4-ditert-butylphenyl) phosphite production              | tris(2,4-ditert-butylphenyl) phosphite                    | Global        |
| refrigerant R134a production                                   | refrigerant R134a                                         | Rest of World |
| chichibabin pyridine synthesis                                 | pyridine                                                  | Rest of World |

|                                                                           |                                                         |               |
|---------------------------------------------------------------------------|---------------------------------------------------------|---------------|
| silicon hydrochloration                                                   | silicon tetrachloride                                   | Global        |
| butyl acrylate production                                                 | butyl acrylate                                          | Rest of World |
| methacrylic acid production                                               | methacrylic acid                                        | Rest of World |
| propionic acid production                                                 | propionic acid                                          | Europe        |
| silicon production, electronics grade                                     | silicon tetrachloride                                   | Rest of World |
| sodium chloride electrolysis                                              | sodium                                                  | Europe        |
| N,N-dimethylformamide production                                          | N,N-dimethylformamide                                   | Europe        |
| sodium phenolate production                                               | sodium phenolate                                        | Rest of World |
| ethylamine production                                                     | ethylamine                                              | Rest of World |
| dehydrogenation of butan-1,4-diol                                         | butyrolactone                                           | Europe        |
| chlorofluorination of ethylene                                            | hexafluoroethane                                        | Global        |
| trisodium phosphate production                                            | trisodium phosphate                                     | Global        |
| sodium formate production                                                 | sodium formate                                          | Global        |
| sodium dichromate production                                              | sodium dichromate                                       | Rest of World |
| maleic anhydride production by catalytic oxidation of benzene             | maleic anhydride                                        | Rest of World |
| pendimethalin production                                                  | pendimethalin                                           | Rest of World |
| nitrobenzene production                                                   | nitrobenzene                                            | Europe        |
| adiponitrile production                                                   | adiponitrile                                            | Europe        |
| silicon tetrachloride production                                          | carbon monoxide                                         | Global        |
| epichlorohydrin production from allyl chloride                            | epichlorohydrin                                         | Rest of World |
| N,N-dimethylformamide production                                          | N,N-dimethylformamide                                   | Rest of World |
| sodium methoxide production                                               | sodium methoxide                                        | Global        |
| phenolic resin production                                                 | phenolic resin                                          | Europe        |
| cyanoacetic acid production                                               | cyanoacetic acid                                        | Rest of World |
| butadiene production                                                      | butadiene                                               | Rest of World |
| aluminium fluoride production                                             | aluminium fluoride                                      | Europe        |
| Mannheim process                                                          | hydrochloric acid, without water, in 30% solution state | Europe        |
| zinc sulfide production                                                   | sulfuric acid                                           | Rest of World |
| 2,4-dichlorophenol production                                             | 2,4-dichlorophenol                                      | Europe        |
| ethyl benzene production                                                  | ethyl benzene                                           | Rest of World |
| chlorotoluron production                                                  | chlorotoluron                                           | Rest of World |
| acetylene production                                                      | acetylene                                               | Rest of World |
| butadiene production                                                      | butadiene                                               | Europe        |
| tetraethyl orthosilicate production                                       | tetraethyl orthosilicate                                | Global        |
| benzene chlorination                                                      | monochlorobenzene                                       | Europe        |
| zinc sulfide production                                                   | sulfuric acid                                           | Europe        |
| arsine production                                                         | arsine                                                  | Global        |
| potassium hydroxide production                                            | hydrogen, liquid                                        | Rest of World |
| allyl chloride production, reaction of propylene and chlorine             | dichloropropene                                         | Rest of World |
| acetaldehyde oxidation                                                    | acetic anhydride                                        | Europe        |
| ethylenediamine production, from ethanolamine                             | ethylenediamine                                         | Europe        |
| 3-methylpyridine production                                               | 3-methylpyridine                                        | Rest of World |
| 1-methylcyclopropene production                                           | 1-methylcyclopropene                                    | Global        |
| cyclohexanone production                                                  | cyclohexanone                                           | Europe        |
| pentaerythritol production in sodium hydroxide solution                   | pentaerythritol                                         | Europe        |
| hydrochloric acid production, from the reaction of hydrogen with chlorine | hydrochloric acid, without water, in 30% solution state | Europe        |
| sodium chloride electrolysis                                              | sodium                                                  | Rest of World |
| refrigerant R134a production                                              | refrigerant R134a                                       | Europe        |
| aclonifen production                                                      | aclonifen                                               | Europe        |
| alpha-naphthol production                                                 | alpha-naphthol                                          | Rest of World |
| trifluoroacetic acid production                                           | trifluoroacetic acid                                    | Rest of World |
| ioxynil production                                                        | ioxynil                                                 | Global        |

|                                                                                                |                                                                         |               |
|------------------------------------------------------------------------------------------------|-------------------------------------------------------------------------|---------------|
| dimethyl sulfoxide production                                                                  | dimethyl sulfoxide                                                      | Rest of World |
| hydroformylation of propylene                                                                  | 1-butanol                                                               | Rest of World |
| isobutyl acetate production                                                                    | isobutyl acetate                                                        | Europe        |
| 3-methyl-1-butyl acetate production                                                            | 3-methyl-1-butyl acetate                                                | Europe        |
| silicon production, electronics grade                                                          | silicon, electronics grade                                              | Germany       |
| trimethylamine production                                                                      | trimethylamine                                                          | Rest of World |
| ethylenediamine production, from ethanolamine                                                  | ethylenediamine                                                         | Rest of World |
| orbencarb production                                                                           | orbencarb                                                               | Europe        |
| glycine production                                                                             | glycine                                                                 | Europe        |
| purification of wet-process phosphoric acid to industrial grade, product in 85% solution state | phosphoric acid, industrial grade, without water, in 85% solution state | Europe        |
| sodium nitrite production                                                                      | sodium nitrite                                                          | Rest of World |
| dimethyl malonate production                                                                   | dimethyl malonate                                                       | Rest of World |
| polydimethylsiloxane production                                                                | polydimethylsiloxane                                                    | Global        |
| sodium nitrate production                                                                      | sodium nitrate                                                          | Rest of World |
| EDTA, ethylenediaminetetraacetic acid production                                               | EDTA, ethylenediaminetetraacetic acid                                   | Europe        |
| o-cresol production                                                                            | o-cresol                                                                | Europe        |
| decarboxylative cyclization of adipic acid                                                     | formic acid                                                             | Europe        |
| heavy water production                                                                         | heavy water                                                             | Rest of World |
| ethylene bromide production                                                                    | ethylene bromide                                                        | Europe        |
| trichloropropane production                                                                    | trichloropropane                                                        | Global        |
| 3-methyl-1-butyl acetate production                                                            | 3-methyl-1-butyl acetate                                                | Rest of World |
| sodium persulfate production                                                                   | sodium persulfate                                                       | Global        |
| glyoxal production                                                                             | glyoxal                                                                 | Europe        |
| fluorination of sodium tetrahydridoborate                                                      | diborane                                                                | Global        |
| ethylene glycol production                                                                     | ethylene glycol                                                         | Rest of World |
| ammonium sulfate production                                                                    | ammonium sulfate                                                        | Europe        |
| calcium ammonium nitrate production                                                            | calcium ammonium nitrate                                                | North America |
| hydroformylation of propylene                                                                  | isobutanol                                                              | Europe        |
| trichloroethylene production                                                                   | hydrochloric acid, without water, in 30% solution state                 | Europe        |
| calcium ammonium nitrate production                                                            | calcium ammonium nitrate                                                | Europe        |
| butane-1,4-diol production                                                                     | butane-1,4-diol                                                         | Europe        |
| thionyl chloride production                                                                    | thionyl chloride                                                        | Rest of World |
| triclopyr production                                                                           | triclopyr                                                               | Global        |
| potassium carbonate production, from potassium hydroxide                                       | potassium carbonate                                                     | Global        |
| ethylene glycol dimethyl ether production                                                      | ethylene glycol dimethyl ether                                          | Rest of World |
| sodium hydrogen sulfite production                                                             | sodium hydrogen sulfite                                                 | Europe        |
| dimethyl hexanediol production                                                                 | dimethyl hexanediol                                                     | Global        |
| toluene oxidation                                                                              | benzoic acid                                                            | Rest of World |
| pendimethalin production                                                                       | pendimethalin                                                           | Europe        |
| urea production                                                                                | urea                                                                    | Rest of World |
| chlorosulfonic acid production                                                                 | chlorosulfonic acid                                                     | Rest of World |
| tert-butyl amine production                                                                    | tert-butyl amine                                                        | Europe        |
| indolylbutyric acid production                                                                 | indolylbutyric acid                                                     | Global        |
| mancozeb production                                                                            | mancozeb                                                                | Europe        |
| 1-naphthylacetic acid production                                                               | 1-naphthylacetic acid                                                   | Global        |
| folpet production                                                                              | folpet                                                                  | Europe        |
| titanium dioxide production, sulfate process                                                   | titanium dioxide                                                        | Rest of World |
| methylamine production                                                                         | methylamine                                                             | Europe        |
| bromopropane production                                                                        | bromopropane                                                            | Rest of World |
| zirconium oxide production                                                                     | zirconium oxide                                                         | Rest of World |

### **S3. Scatter plots – process mass- and energy-based metric scores vs. Environmental Footprint life cycle impacts**

**Figures S1 to S16** present the scatter plots between each process-level mass- and energy-based metric (E-factor incl. water, E-factor excl. water, Process Mass Intensity, Mass Intensity and Process Energy Intensity) and life cycle impact category of the Environmental Footprint method. The following scatter plots serve as a visual of the correlation strengths presented in **Figure 2** of the main text – *i.e.*, higher correlation coefficients correspond to a stronger relationship between the process-level metric and life cycle impact (an increase in one corresponds to an increase in the other). Scatter plot points are colour coded according to whether product compounds are organic or inorganic to visualise the composition of our analysed dataset.



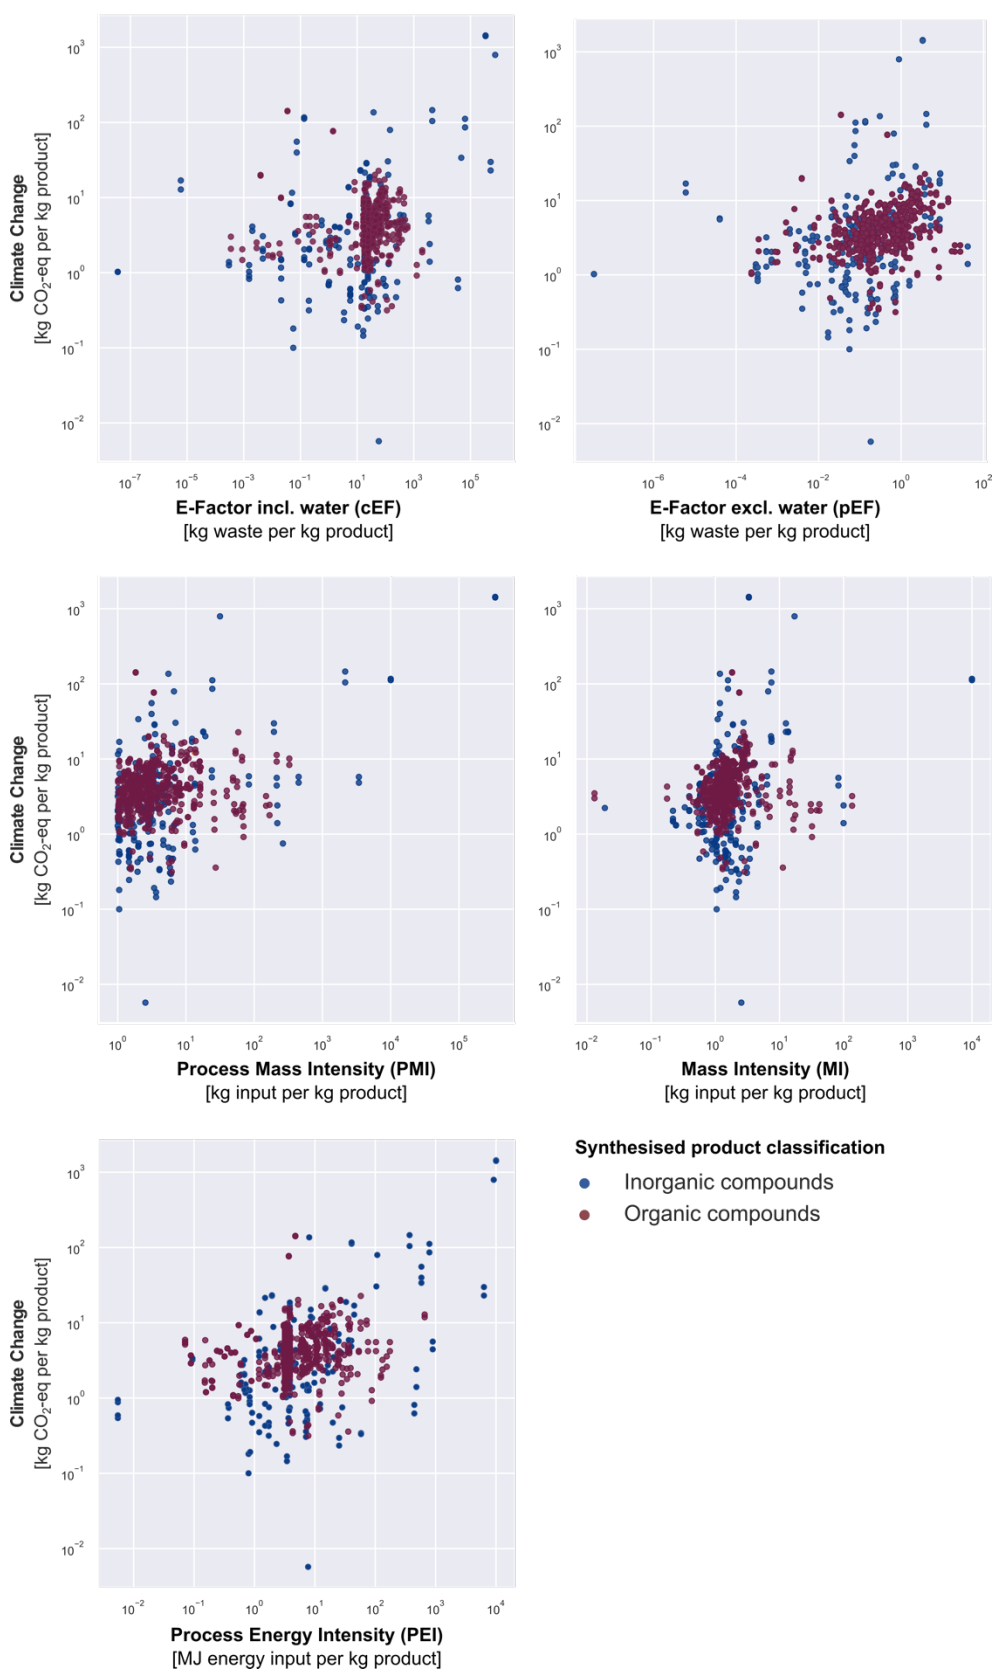

**Figure S1.** Scatter plots for life cycle climate change impacts (y-axis) vs. process-level metrics (x-axis) ( $N = 711$  processes). Each data point corresponds to the impact and metric score of a chemical production process. Colour of data points correspond to the organic/inorganic classification of the product.

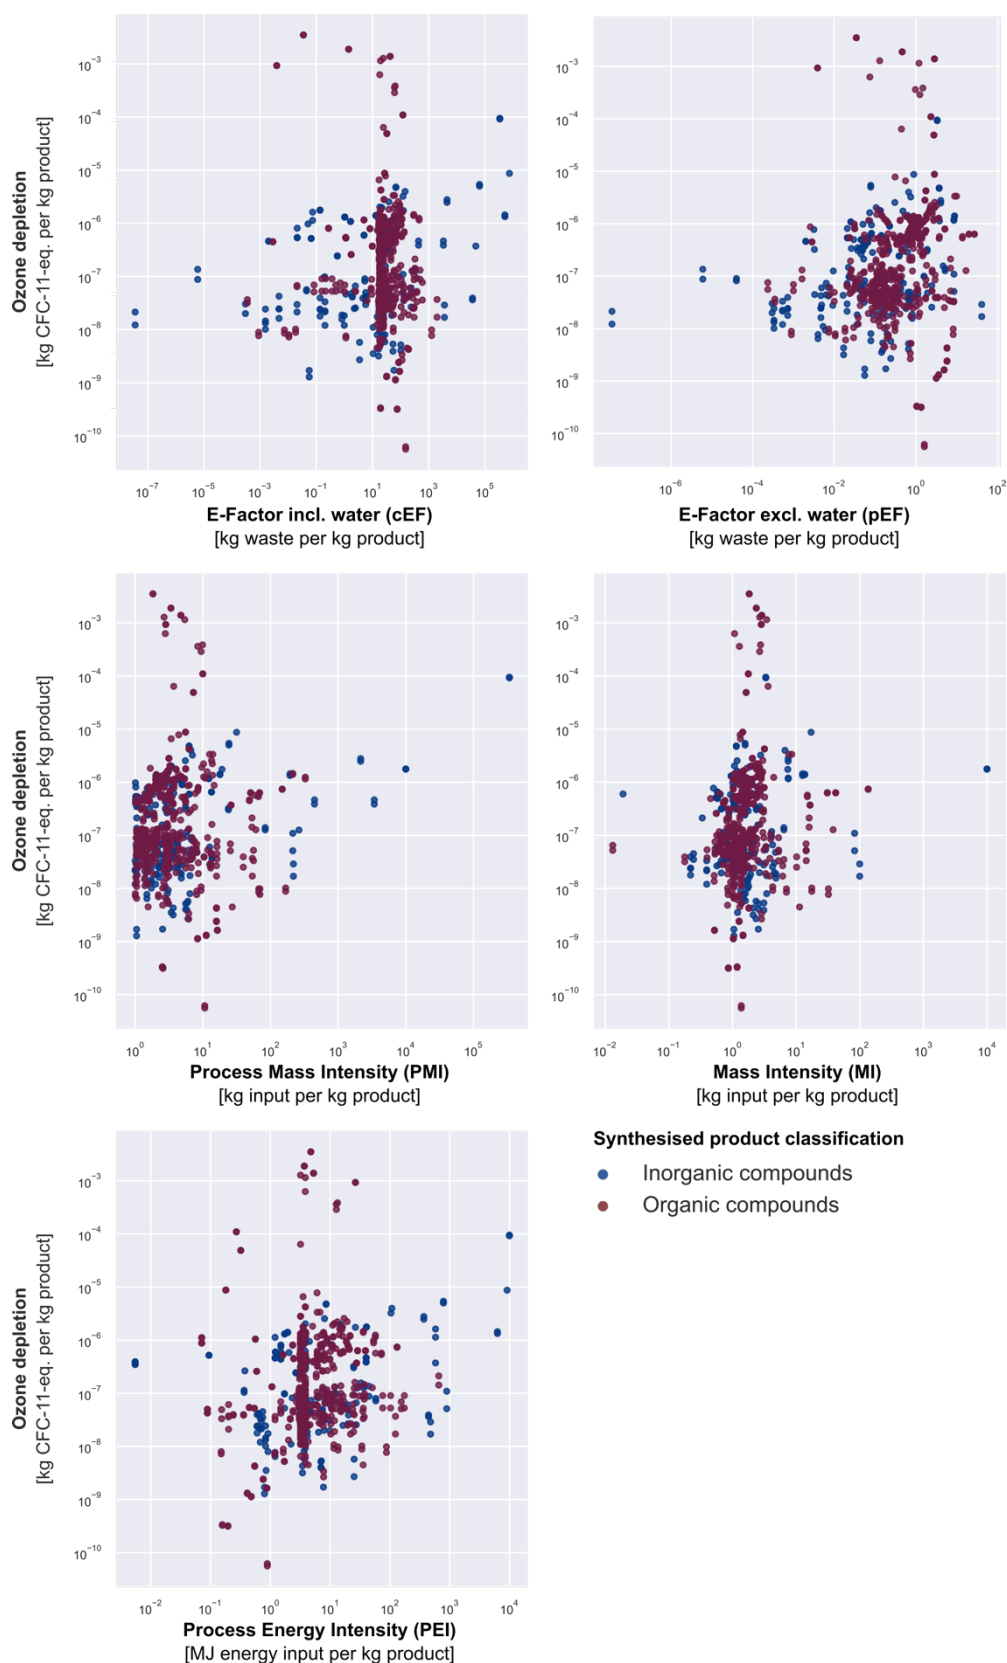

**Figure S2.** Scatter plots for life cycle ozone depletion impacts (y-axis) vs. process-level metrics (x-axis) ( $N = 711$  processes). Each data point corresponds to the impact and metric score of a chemical production process. Colour of data points correspond to the organic/inorganic classification of the product.

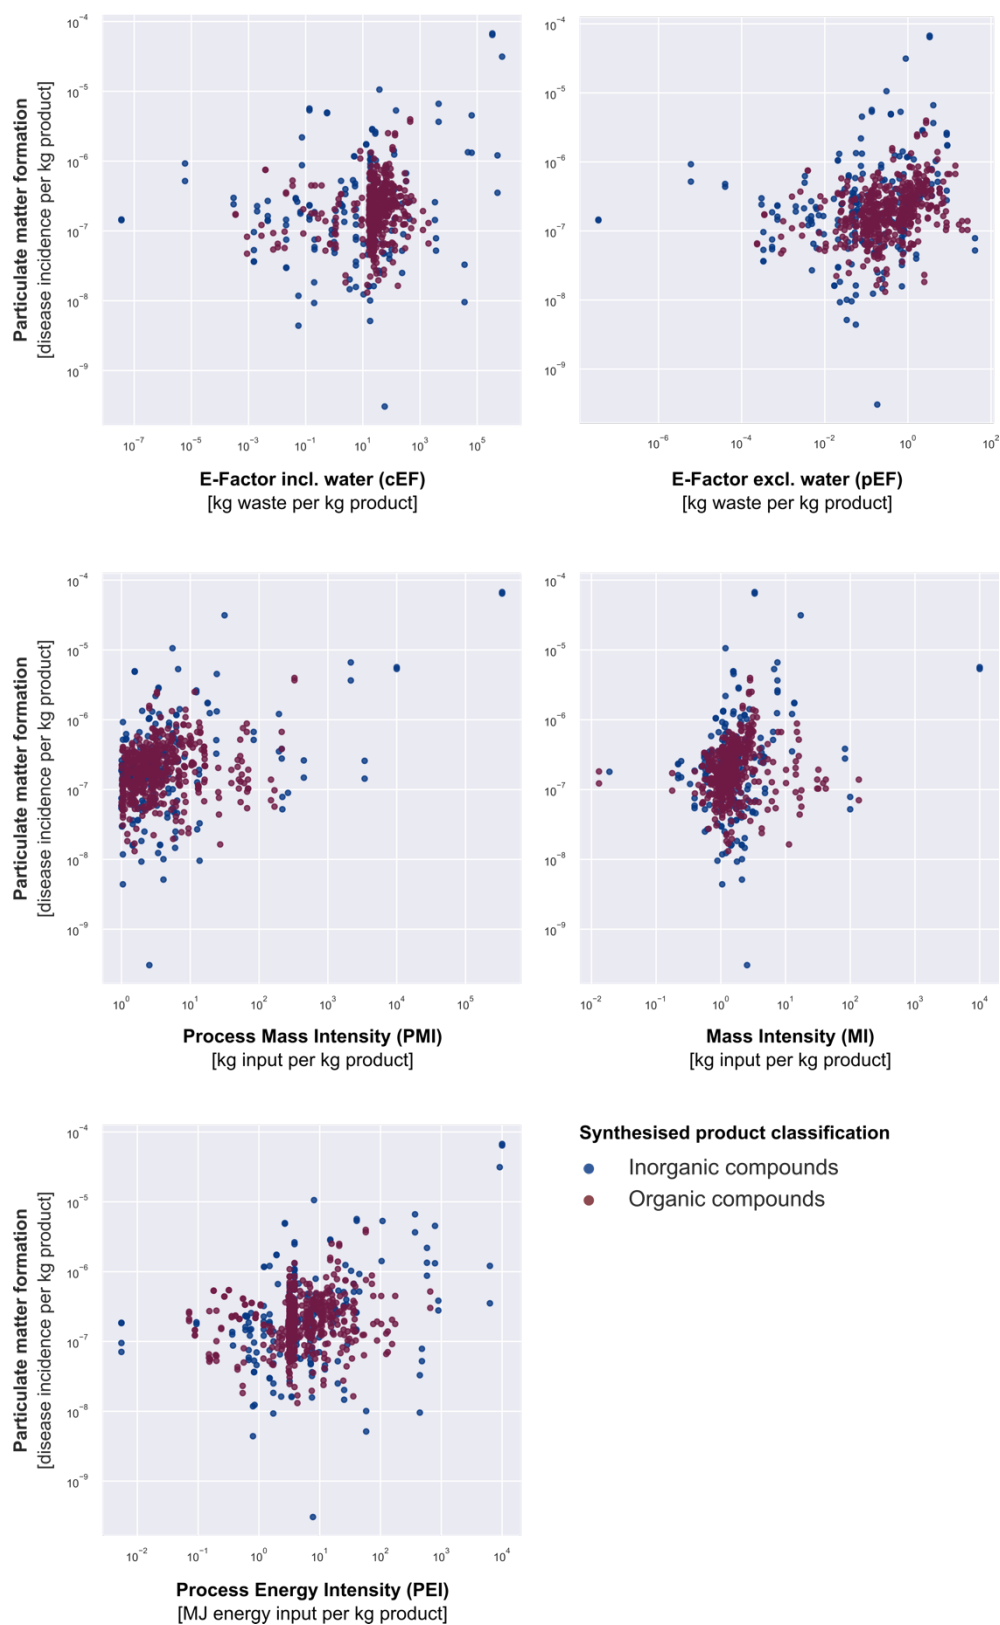

**Figure S3.** Scatter plots for life cycle particulate matter formation impacts (y-axis) vs. process-level metrics (x-axis) ( $N = 711$  processes). Each data point corresponds to the impact and metric score of a chemical production process. Colour of data points correspond to the organic/inorganic classification of the product.

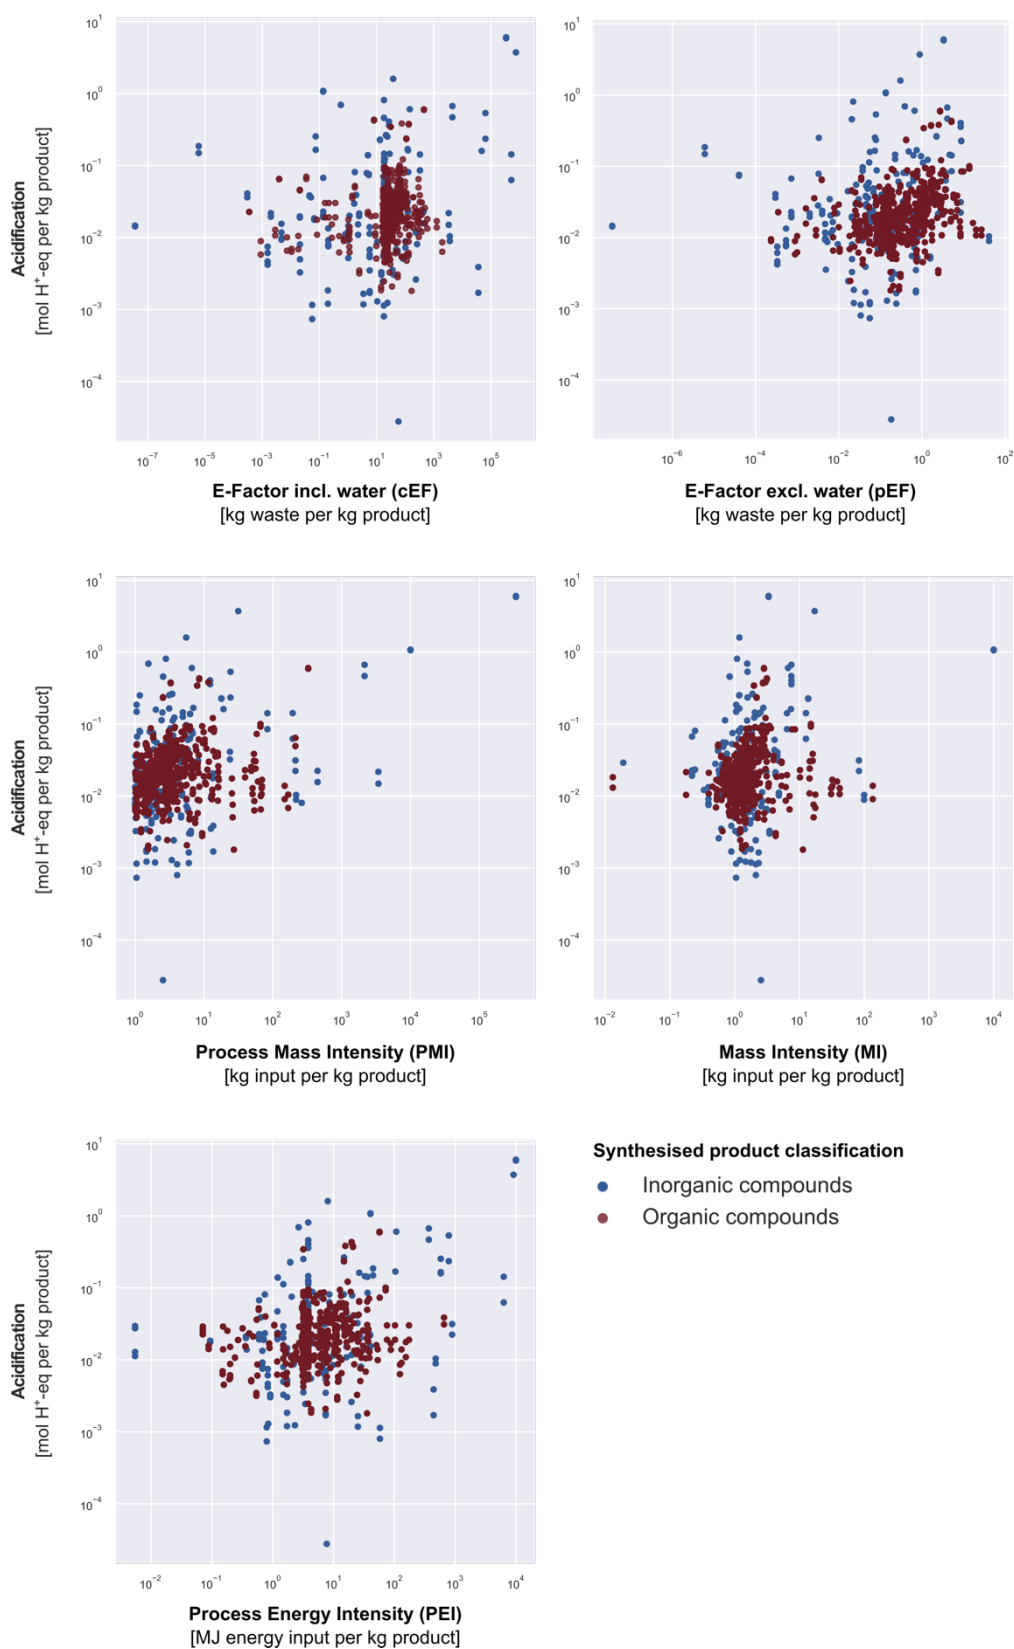

**Figure S4.** Scatter plots for life cycle acidification impacts (y-axis) vs. process-level metrics (x-axis) ( $N = 711$  processes). Each data point corresponds to the impact and metric score of a chemical production process. Colour of data points correspond to the organic/inorganic classification of the product.

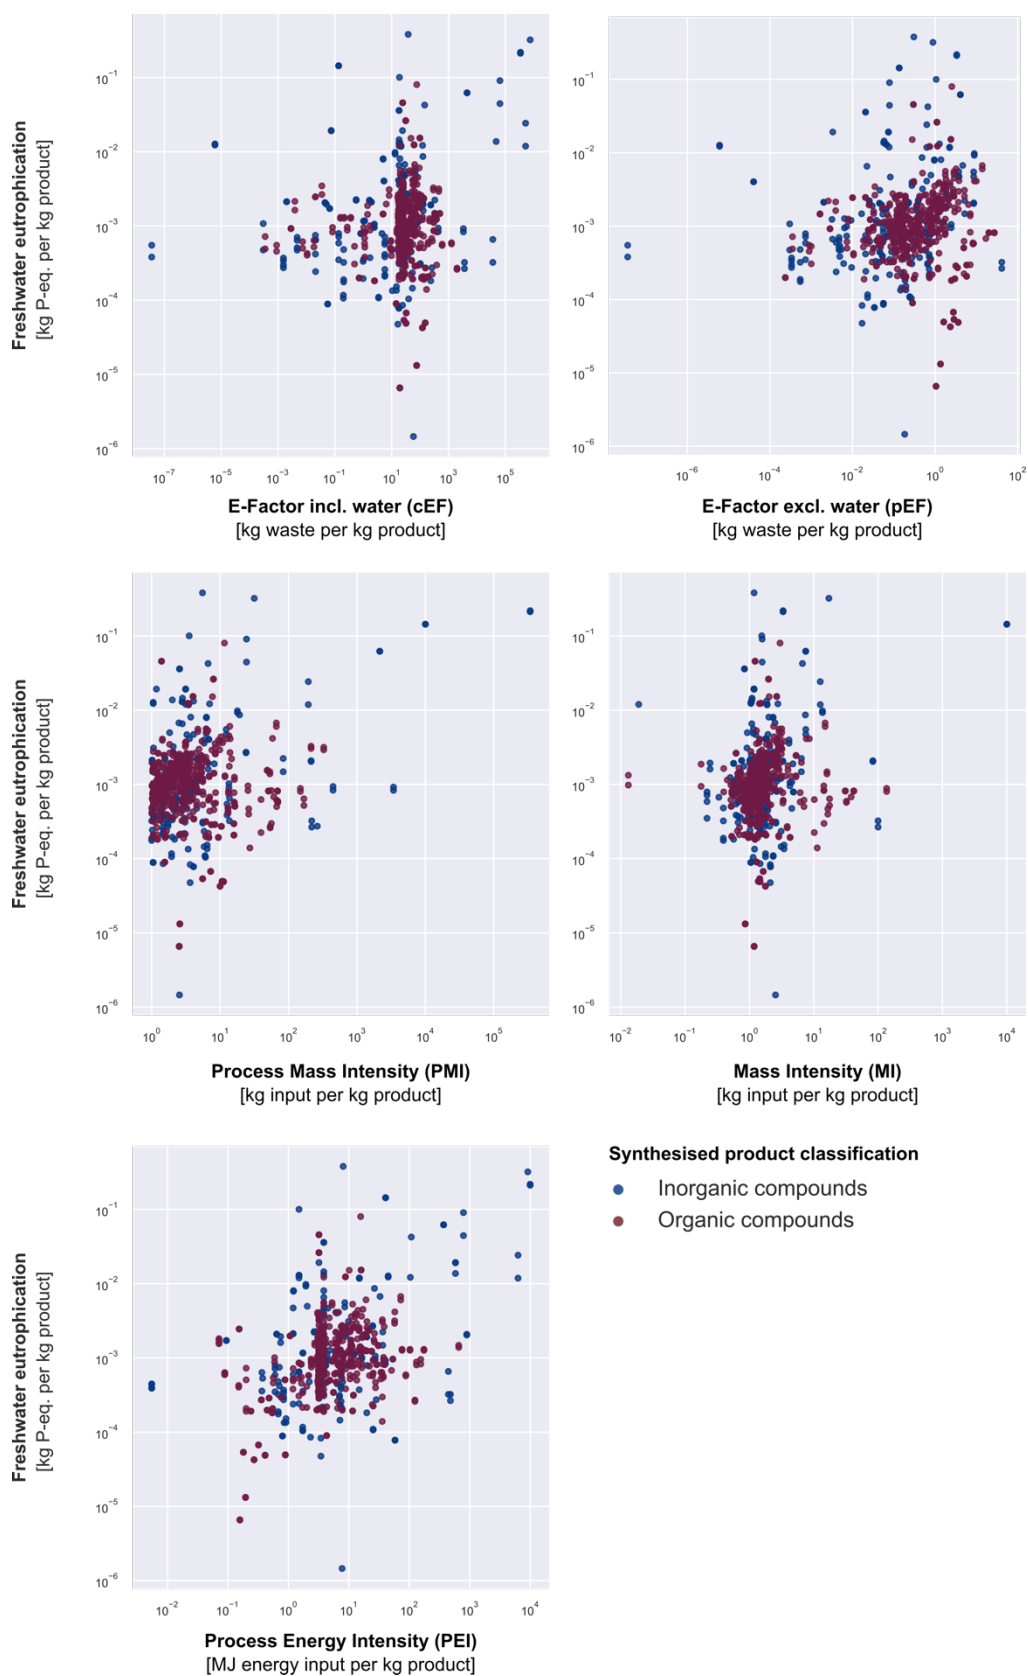

**Figure S5.** Scatter plots for life cycle freshwater eutrophication impacts (y-axis) vs. process-level metrics (x-axis) ( $N = 711$  processes). Each data point corresponds to the impact and metric score of a chemical production process. Colour of data points correspond to the organic/inorganic classification of the product.

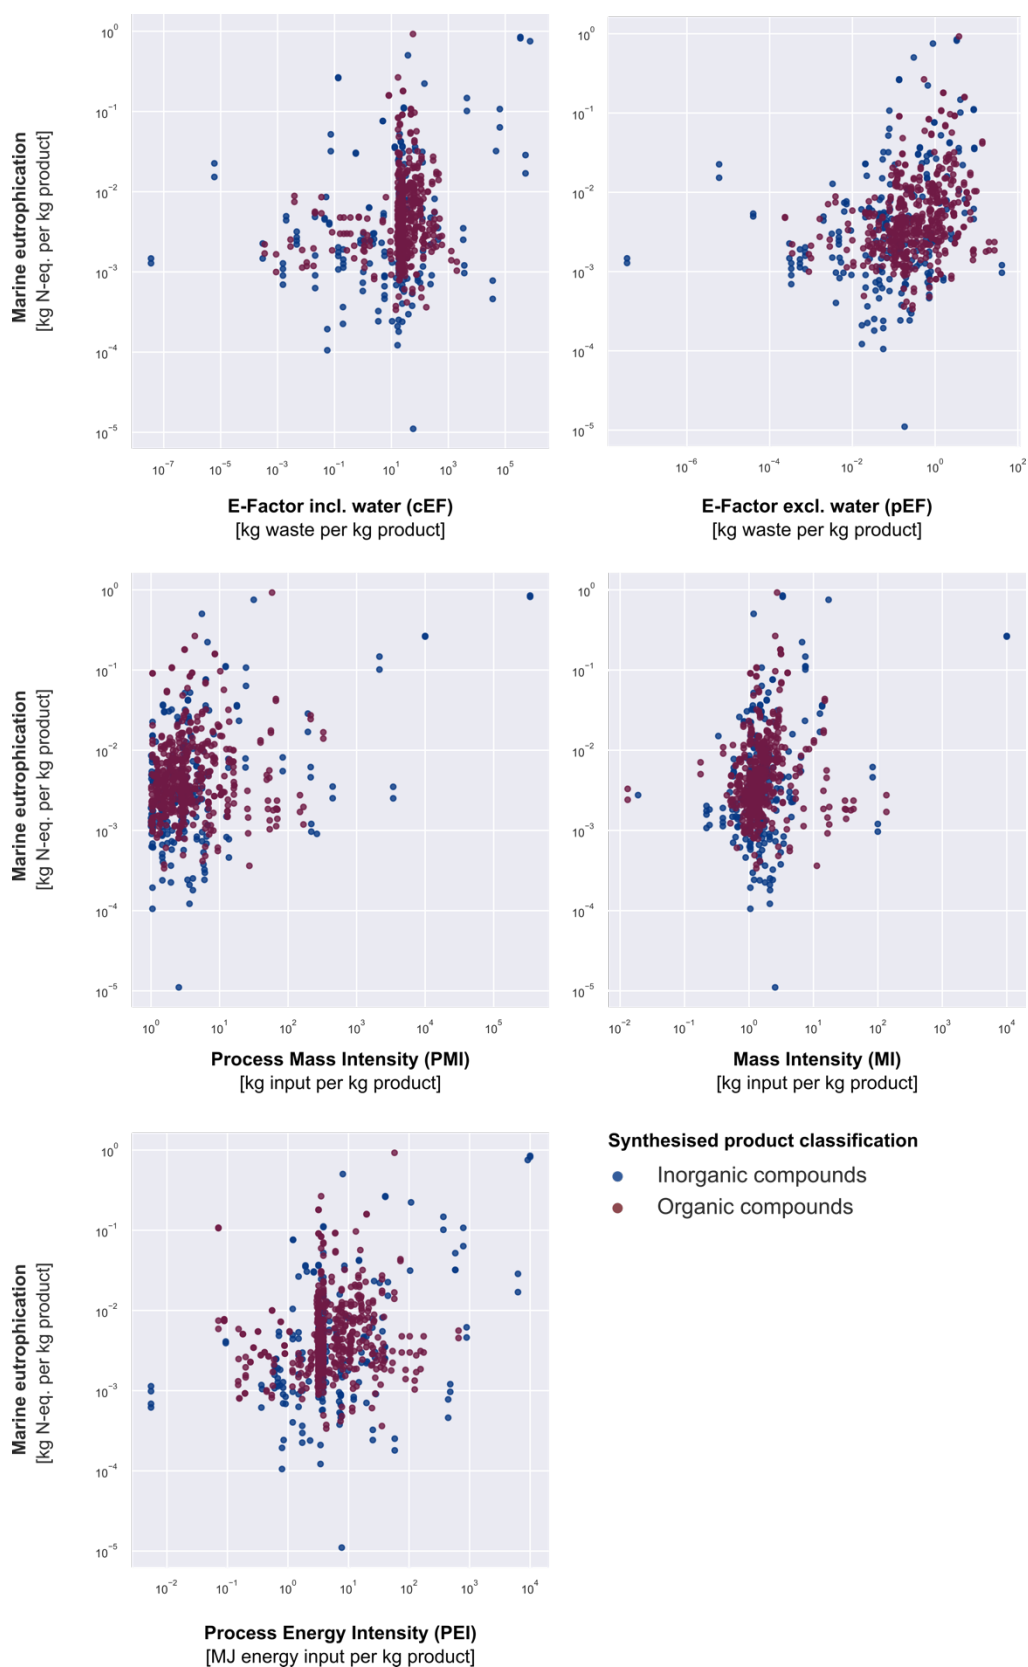

**Figure S6.** Scatter plots for life cycle marine eutrophication impacts (y-axis) vs. process-level metrics (x-axis) ( $N = 711$  processes). Each data point corresponds to the impact and metric score of a chemical production process. Colour of data points correspond to the organic/inorganic classification of the product.

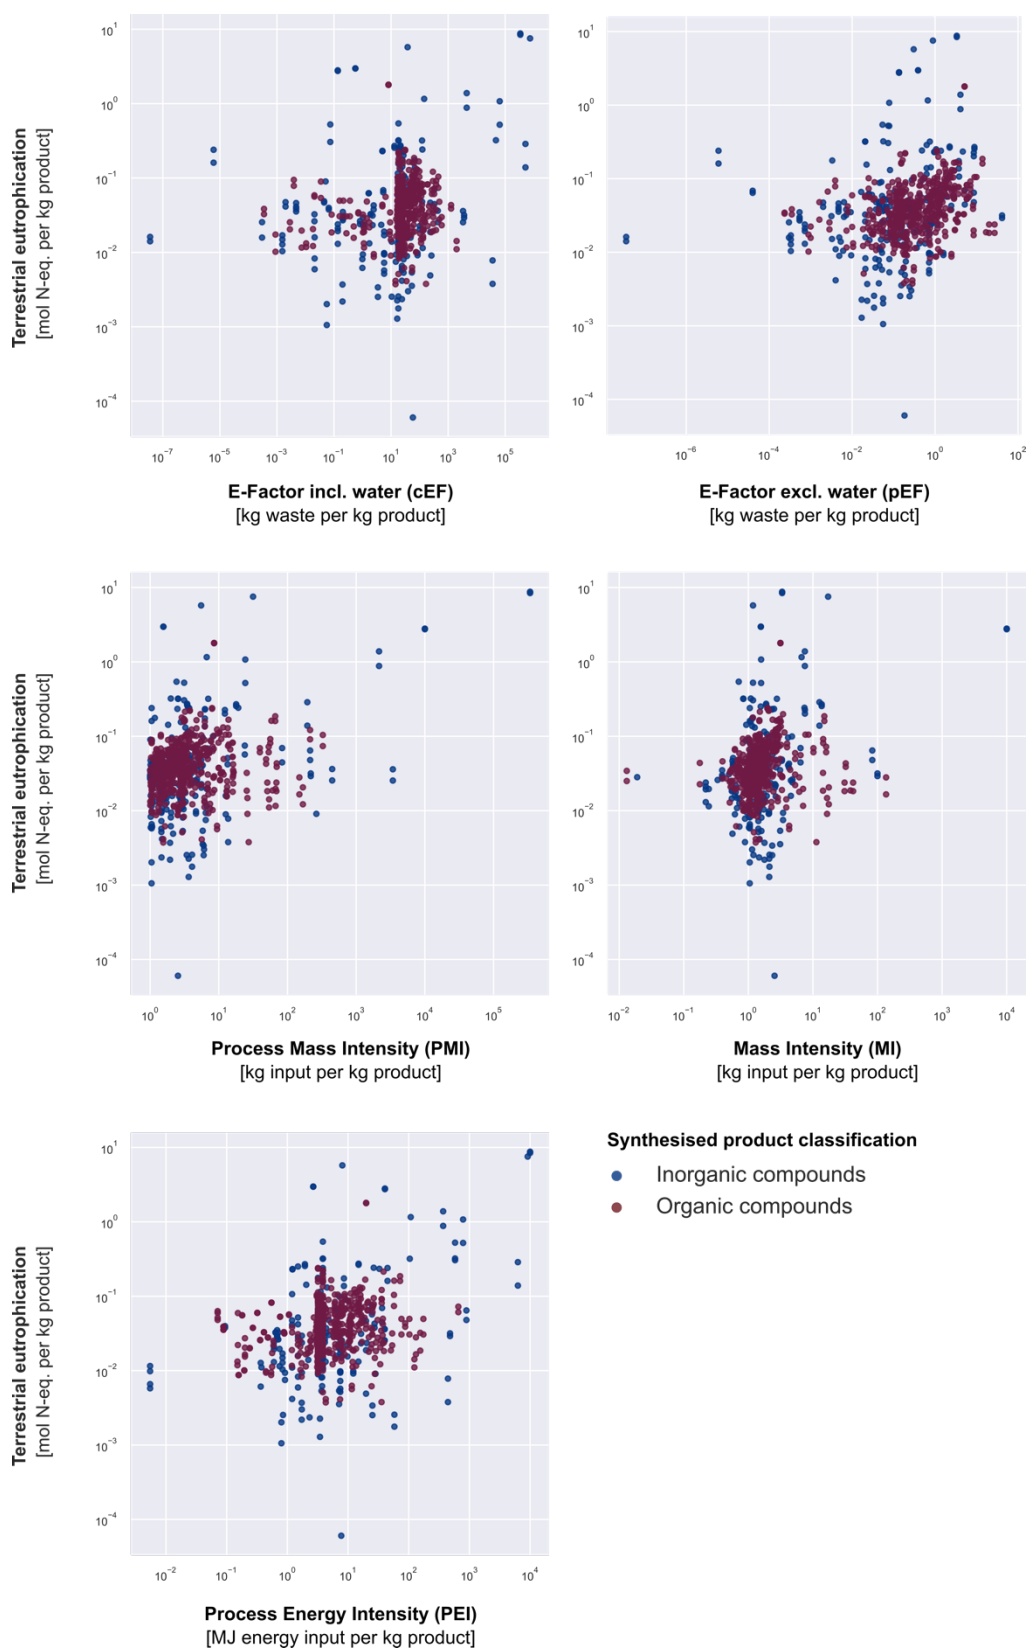

**Figure S7.** Scatter plots for life cycle terrestrial eutrophication impacts (y-axis) vs. process-level metrics (x-axis) ( $N = 711$  processes). Each data point corresponds to the impact and metric score of a chemical production process. Colour of data points correspond to the organic/inorganic classification of the product.

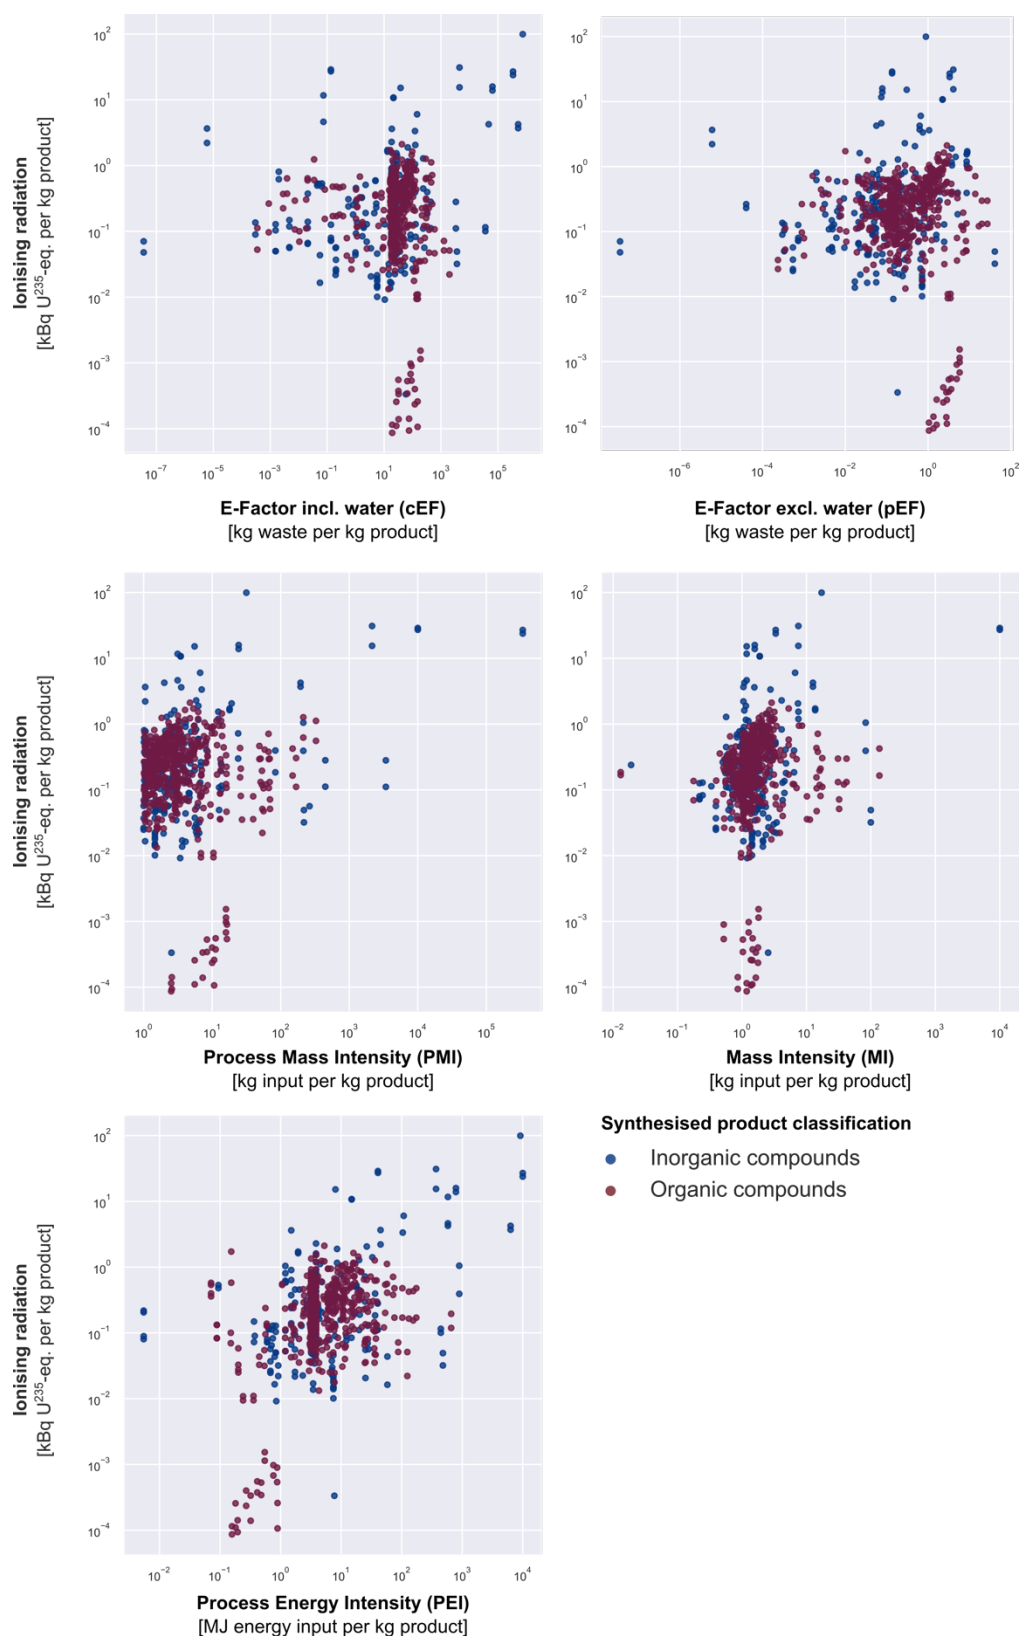

**Figure S8.** Scatter plots for life cycle ionising radiation impacts (y-axis) vs. process-level metrics (x-axis) ( $N = 711$  processes). Each data point corresponds to the impact and metric score of a chemical production process. Colour of data points correspond to the organic/inorganic classification of the product.



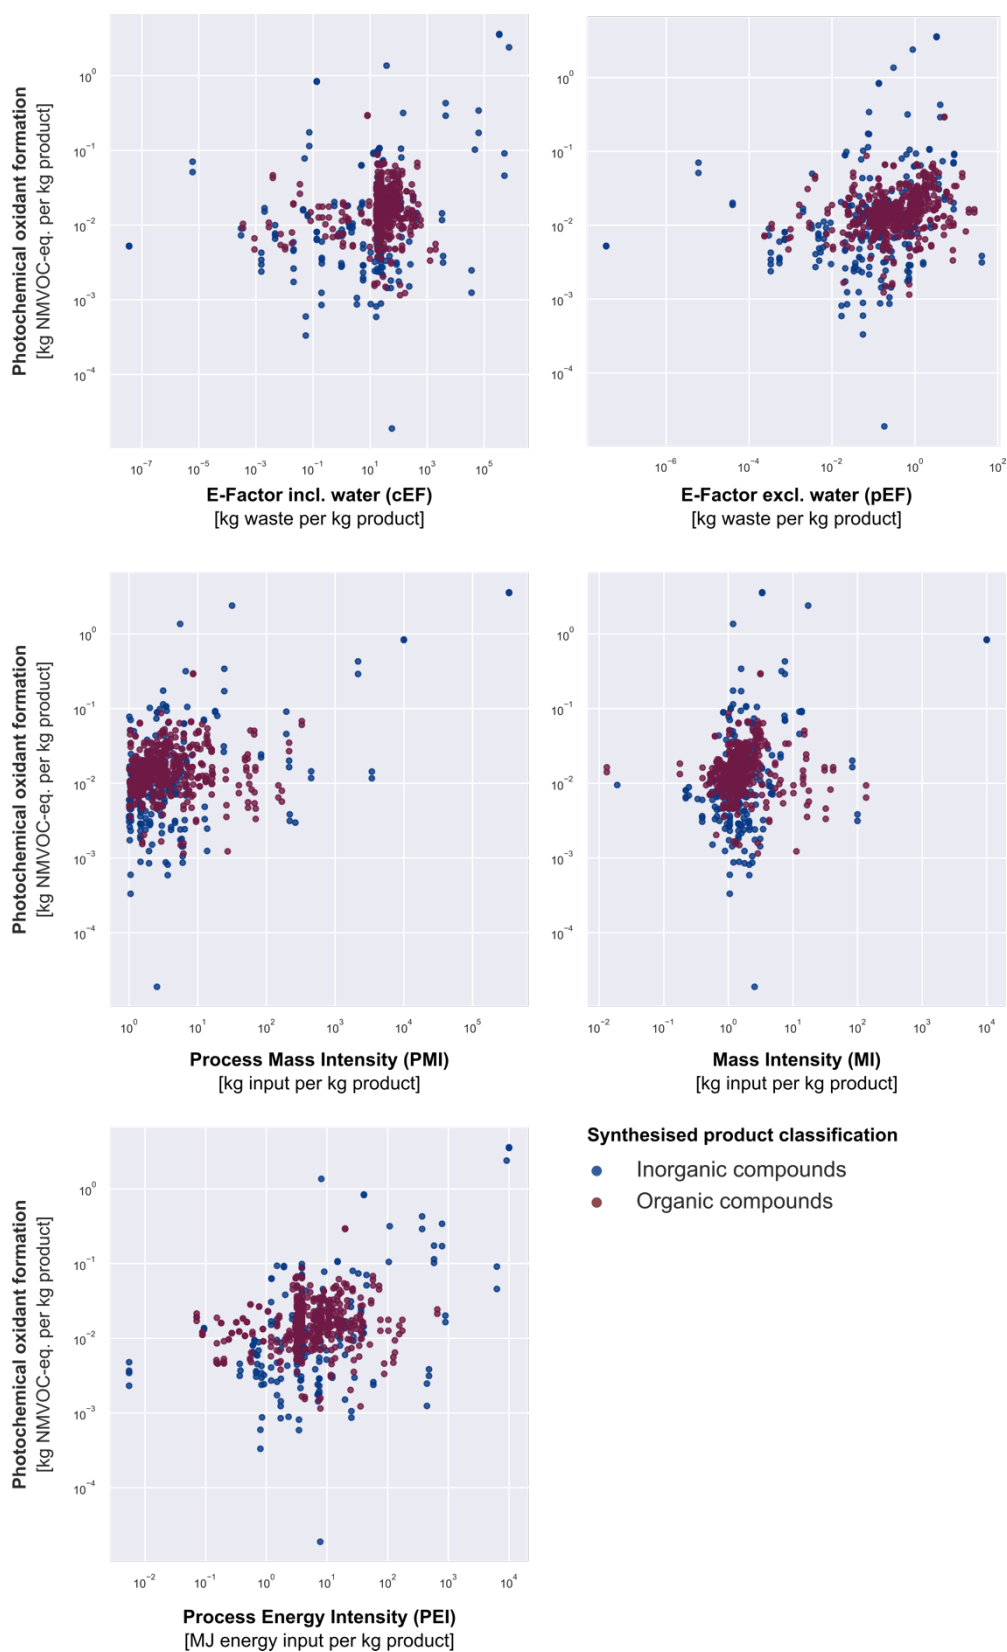

**Figure S9.** Scatter plots for life cycle photochemical ozone formation impacts (y-axis) vs. process-level metrics (x-axis) ( $N = 711$  processes). Each data point corresponds to the impact and metric score of a chemical production process. Colour of data points correspond to the organic/inorganic classification of the product. Unit of NMVOC-eq. refers to Non-Methane Volatile Organic Compound equivalents.

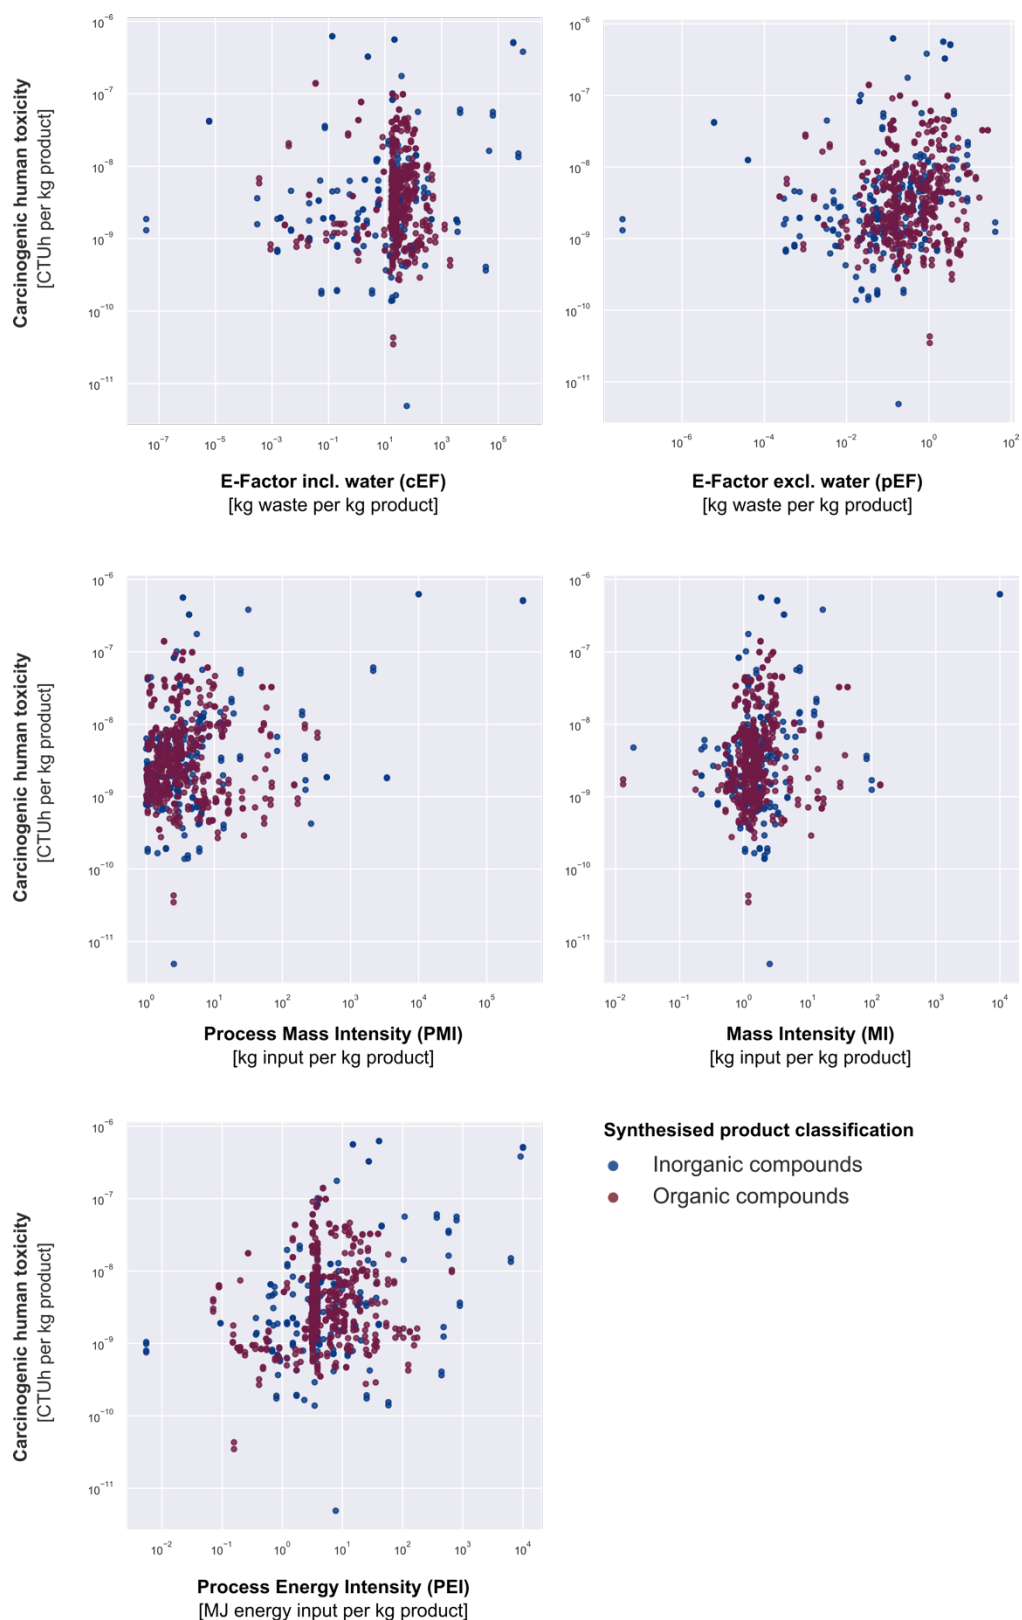

**Figure S10.** Scatter plots for life cycle carcinogenic human toxicity impacts (y-axis) vs. process-level metrics (x-axis) ( $N = 711$  processes). Each data point corresponds to the impact and metric score of a chemical production process. Colour of data points correspond to the organic/inorganic classification of the product. Unit of CTUh refers to Comparative Toxic Unit, human health.

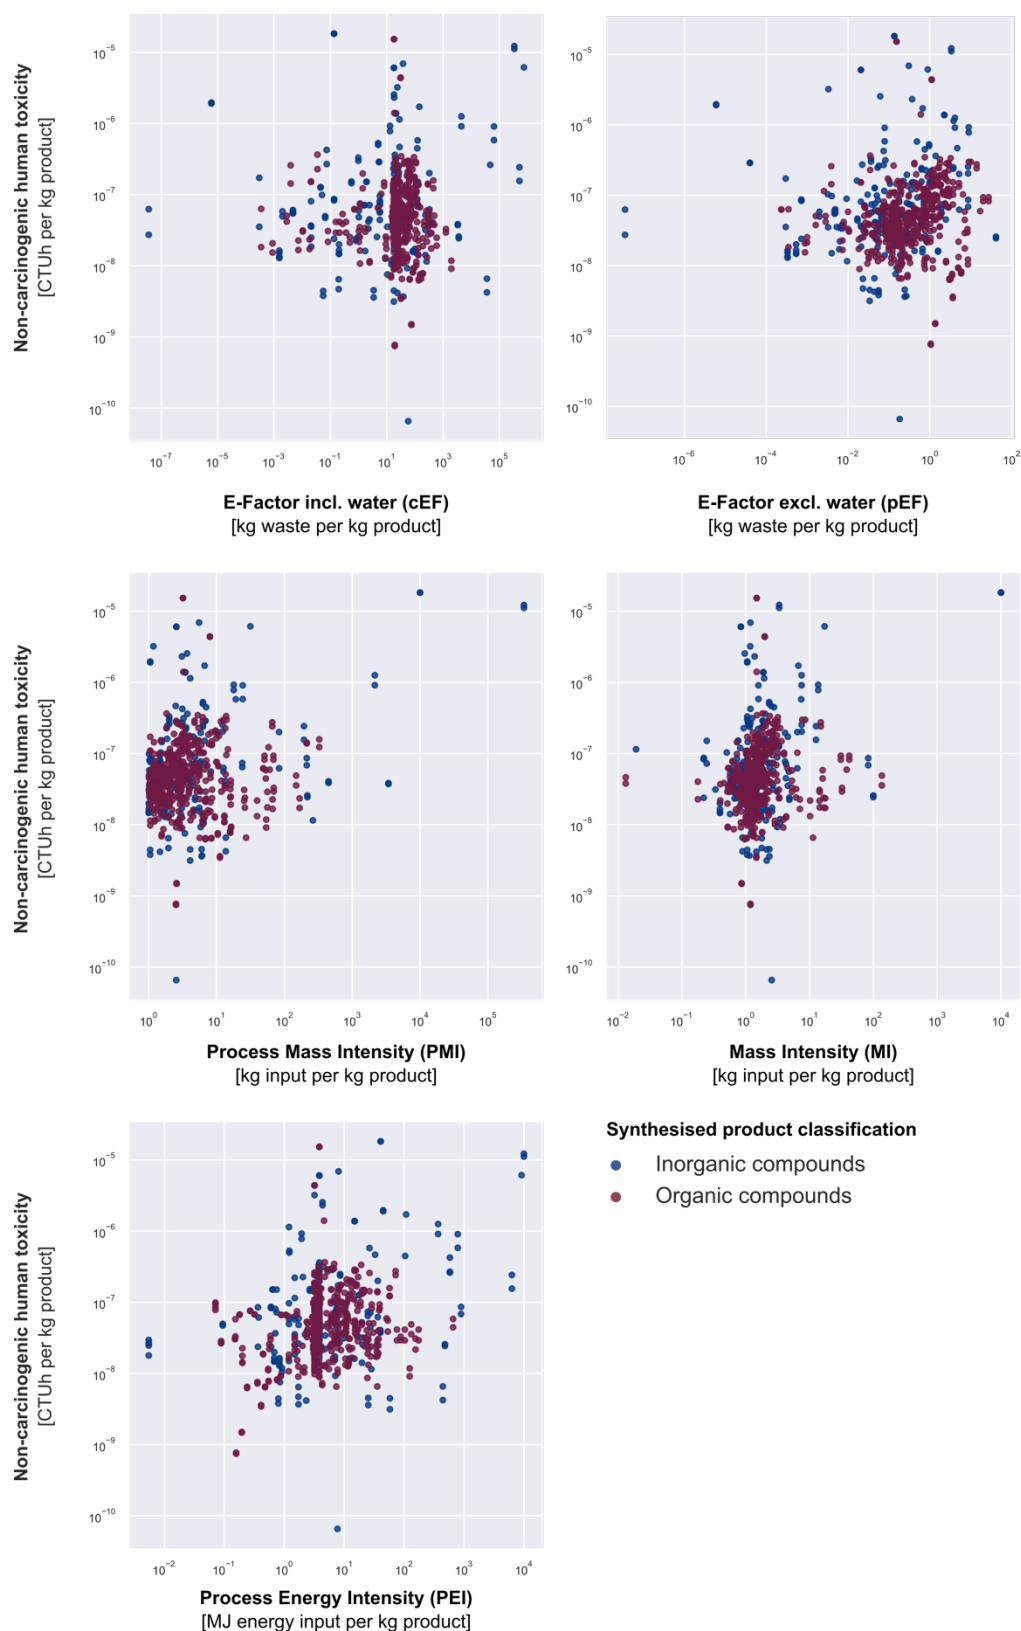

**Figure S11.** Scatter plots for life cycle non-carcinogenic human toxicity impacts (y-axis) vs. process-level metrics (x-axis) ( $N = 711$  processes). Each data point corresponds to the impact and metric score of a chemical production process. Colour of data points correspond to the organic/inorganic classification of the product. Unit of CTUh refers to Comparative Toxic Unit, human health.

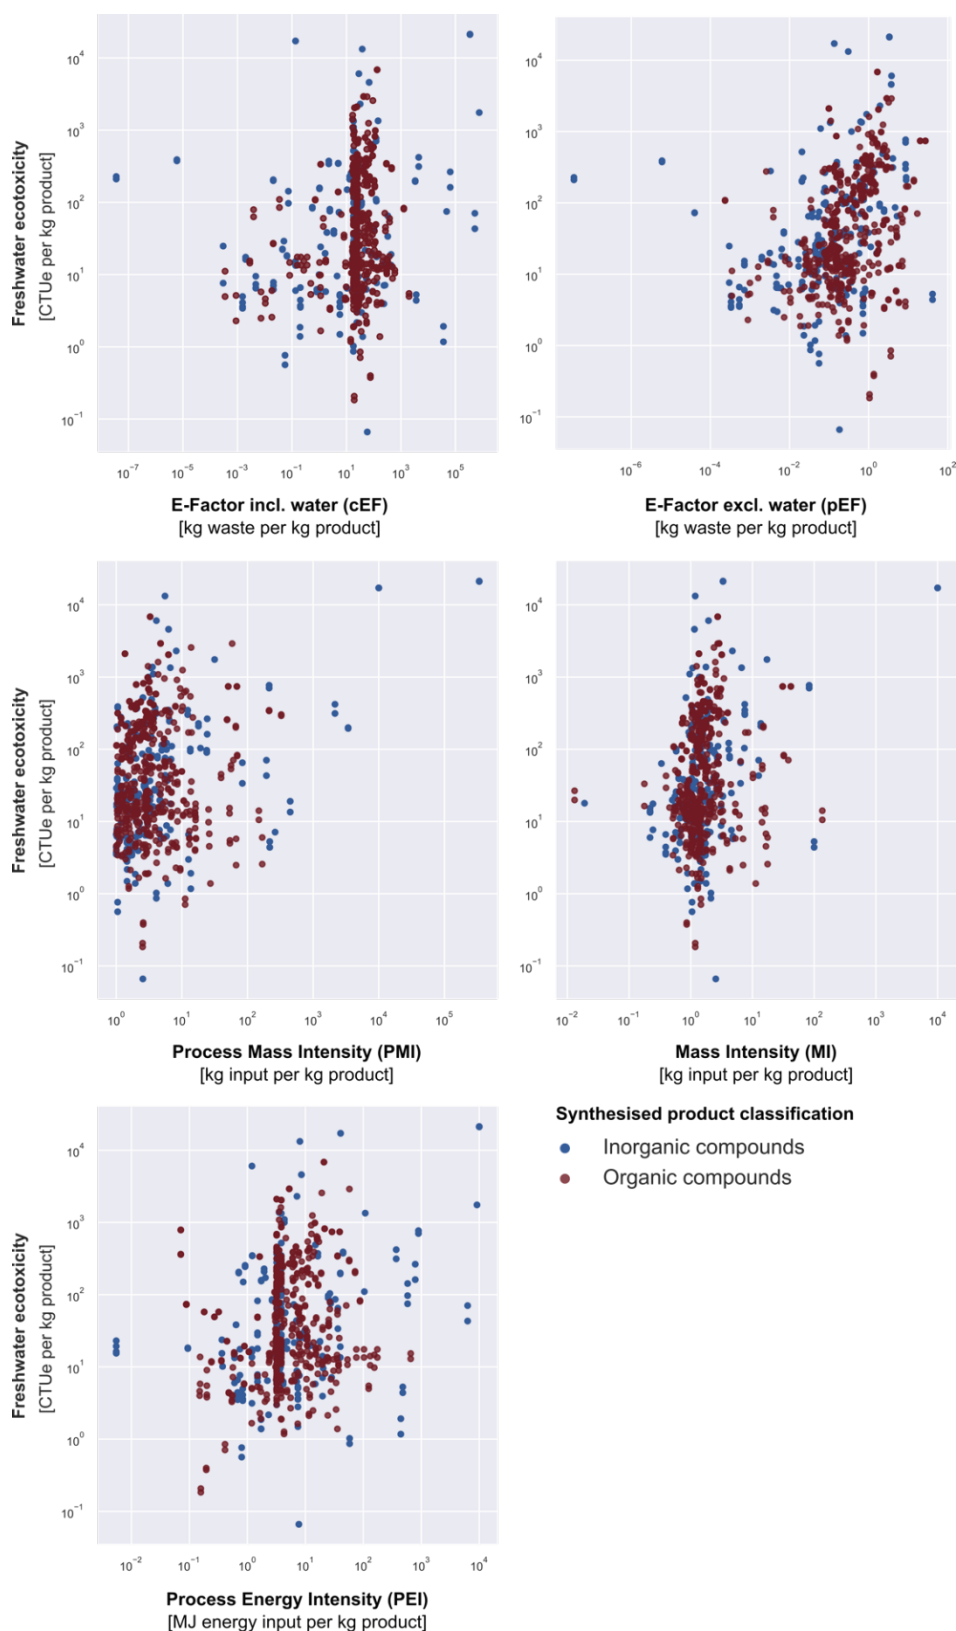

**Figure S12.** Scatter plots for life cycle freshwater ecotoxicity impacts (y-axis) vs. process-level metrics (x-axis) ( $N = 711$  processes). Each data point corresponds to the impact and metric score of a chemical production process. Colour of data points correspond to the organic/inorganic classification of the product. Unit of CTUe refers to Comparative Toxic Unit, ecotoxicity.

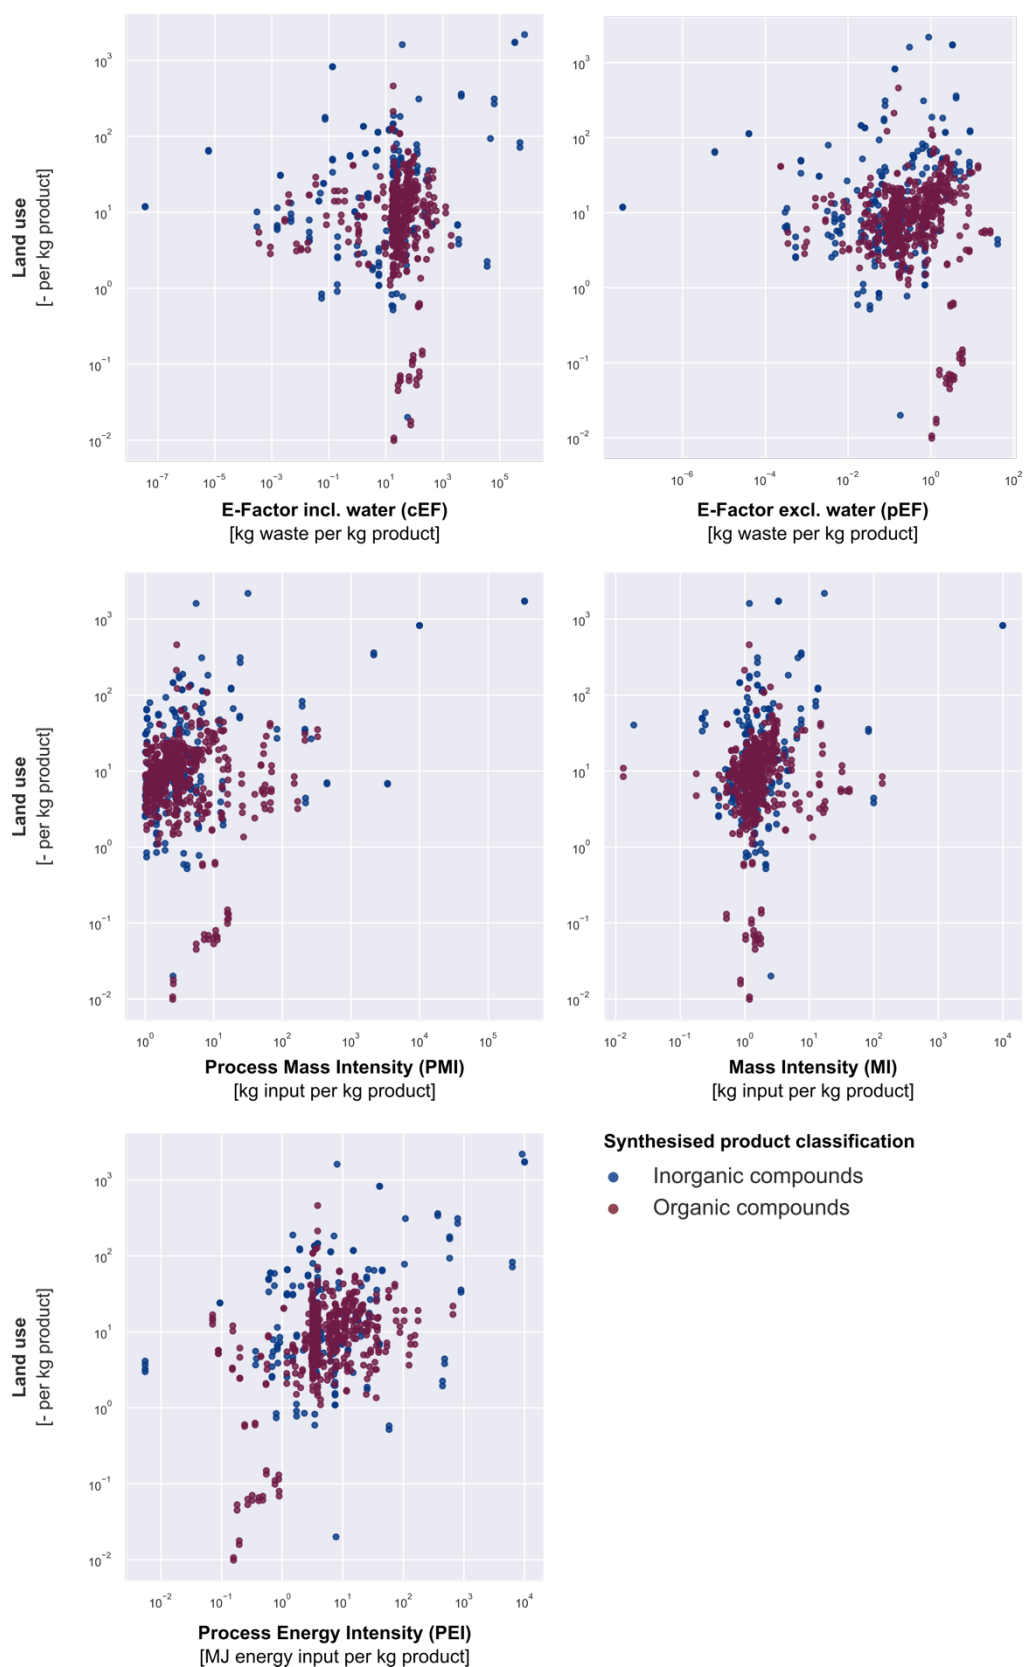

**Figure S13.** Scatter plots for life cycle land use impacts (y-axis) vs. process-level metrics (x-axis) ( $N = 711$  processes). Each data point corresponds to the impact and metric score of a chemical production process. Colour of data points correspond to the organic/inorganic classification of the product. Unit for land use is dimensionless, based on a soil quality index.

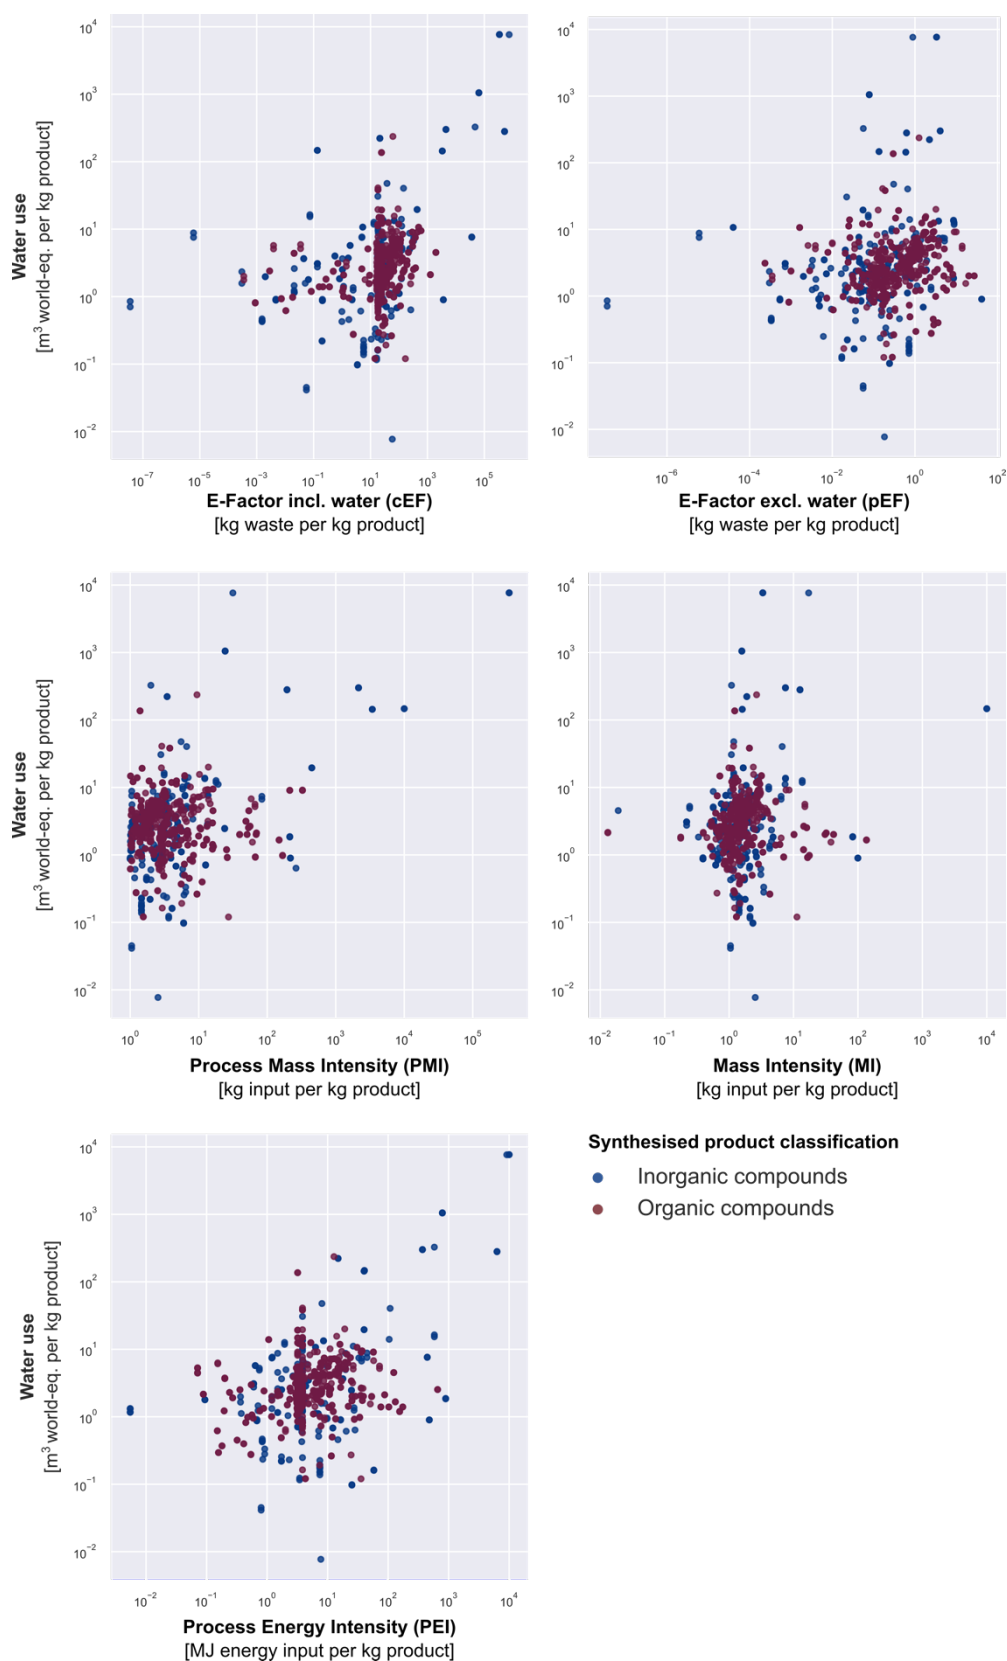

**Figure S14.** Scatter plots for life cycle water use impacts (y-axis) vs. process-level metrics (x-axis) ( $N = 711$  processes). Each data point corresponds to the impact and metric score of a chemical production process. Colour of data points correspond to the organic/inorganic classification of the product.

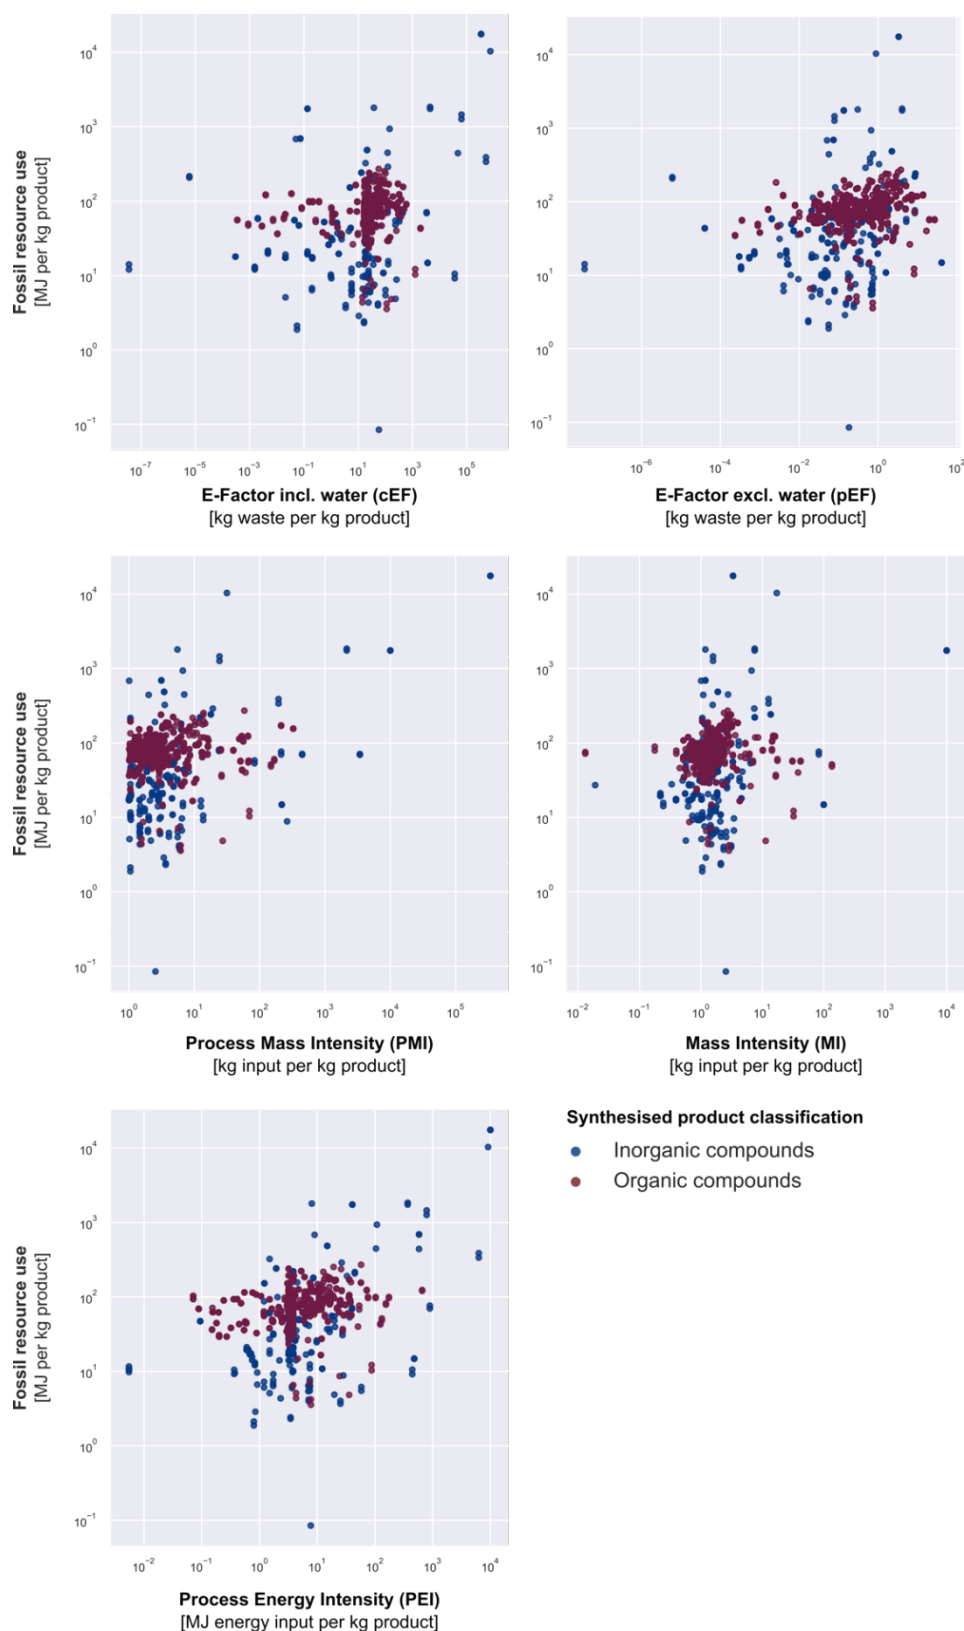

**Figure S15.** Scatter plots for life cycle fossil resource use impacts (y-axis) vs. process-level metrics (x-axis) ( $N = 711$  processes). Each data point corresponds to the impact and metric score of a chemical production process. Colour of data points correspond to the organic/inorganic classification of the product.

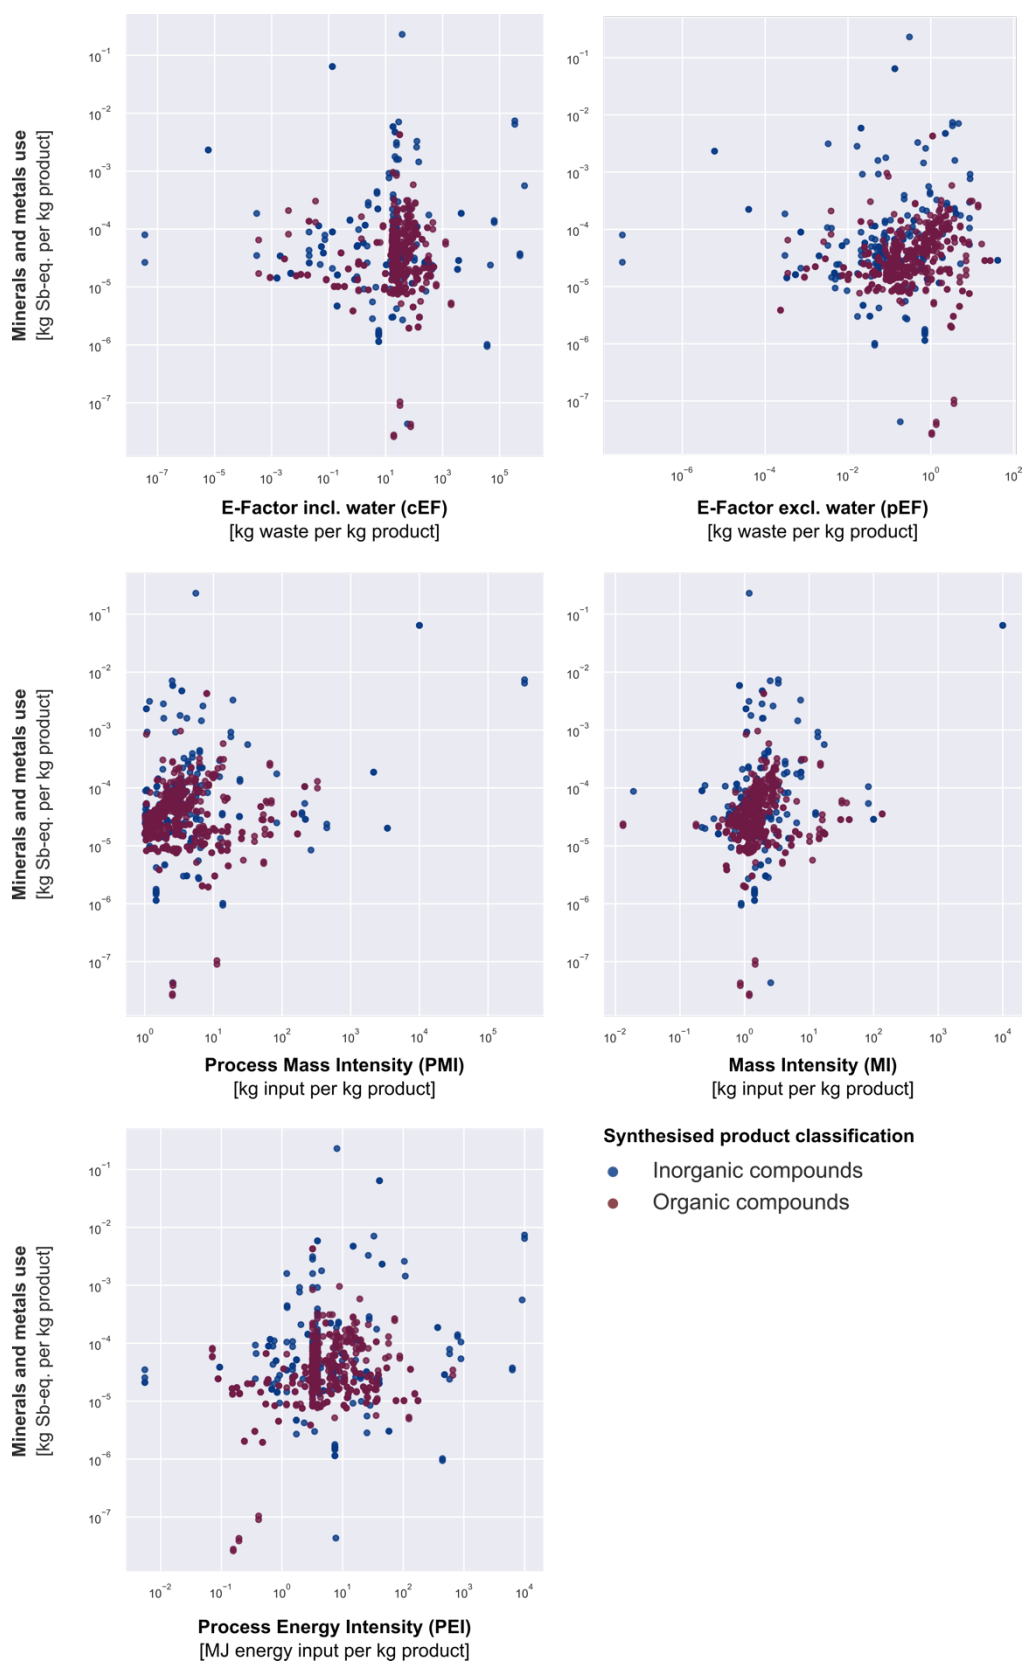

**Figure S16.** Scatter plots for life cycle minerals and metals use impacts (y-axis) vs. process-level metrics (x-axis) ( $N = 711$  processes). Each data point corresponds to the impact and metric score of a chemical production process. Colour of data points correspond to the organic/inorganic classification of the product.



#### **S4. Mean and degree of variation of life cycle impact contributions from main process drivers**

**Figure 4** in the main text shows the average percentage contributions to the total life cycle impacts of a chemical process. Coefficients of variation, presented in **Table S3**, are a measure of the distribution of contributions across all 711 chemical processes analysed. Coefficients of variation are a ratio of the standard deviation to the mean and expressed as a percentage. Raw material contributions have the lowest coefficients of variation across all life cycle impact categories meaning that contributions are most narrowly distributed and vary from the mean value the least.

**Table S3:** Mean and coefficient of variation values for contributions to life cycle impacts of chemical processes (N = 711). For example, the mean contribution to climate change impacts from raw materials is 70% and has a 37% level of dispersion around this mean value. Contributions from raw materials refer to the life cycle impacts associated with the activities to produce and distribute each input material until entering the chemical process. Similarly, contributions from energy correspond to the impacts associated with the generation and distribution of electricity, heating from steam or natural gas, etc. Contributions from other utilities refer to impacts from cooling water, liquid nitrogen, and compressed air. Chemical plant contributions are the impacts from the construction of the chemical plant, including required materials (e.g., steel and concrete), energy, and water. Waste treatment or disposal refers to the impacts from incinerating spent solvent or hazardous waste from the production process, while wastewater contributions cover impacts from treating the amount of wastewater generated by the process.

| <u>Source of impact contribution</u> | <u>Raw material</u> |                              | <u>Energy</u> |                              | <u>Infrastructure</u> |                              | <u>Other utilities</u> |                              | <u>Waste treatment or disposal</u> |                              | <u>Wastewater treatment</u> |                              |
|--------------------------------------|---------------------|------------------------------|---------------|------------------------------|-----------------------|------------------------------|------------------------|------------------------------|------------------------------------|------------------------------|-----------------------------|------------------------------|
|                                      | Mean                | Coefficient of variation (%) | Mean          | Coefficient of variation (%) | Mean                  | Coefficient of variation (%) | Mean                   | Coefficient of variation (%) | Mean                               | Coefficient of variation (%) | Mean                        | Coefficient of variation (%) |
| Climate change                       | 0.70                | 37                           | 0.19          | 106                          | 0.02                  | 123                          | 0.01                   | 487                          | 0.00                               | 496                          | 0.00                        | 933                          |
| Ozone depletion                      | 0.79                | 34                           | 0.13          | 143                          | 0.02                  | 189                          | 0.01                   | 582                          | 0.03                               | 531                          | 0.00                        | 1293                         |
| Particulate matter formation         | 0.72                | 38                           | 0.15          | 126                          | 0.04                  | 116                          | 0.01                   | 468                          | 0.00                               | 594                          | 0.00                        | 1151                         |
| Acidification                        | 0.71                | 37                           | 0.14          | 121                          | 0.05                  | 108                          | 0.01                   | 418                          | 0.00                               | 840                          | 0.00                        | 986                          |
| Freshwater eutrophication            | 0.64                | 44                           | 0.20          | 100                          | 0.08                  | 108                          | 0.01                   | 377                          | 0.04                               | 431                          | 0.00                        | 872                          |
| Marine eutrophication                | 0.65                | 45                           | 0.14          | 124                          | 0.03                  | 118                          | 0.01                   | 510                          | 0.00                               | 667                          | 0.00                        | 993                          |
| Terrestrial eutrophication           | 0.71                | 36                           | 0.15          | 116                          | 0.04                  | 103                          | 0.01                   | 465                          | 0.00                               | 555                          | 0.00                        | 973                          |
| Ionising radiation                   | 0.63                | 46                           | 0.26          | 89                           | 0.06                  | 137                          | 0.01                   | 371                          | 0.04                               | 498                          | 0.00                        | 965                          |
| Photochemical ozone formation        | 0.72                | 35                           | 0.14          | 118                          | 0.03                  | 124                          | 0.01                   | 455                          | 0.00                               | 577                          | 0.00                        | 960                          |
| Carcinogenic human toxicity          | 0.63                | 47                           | 0.08          | 164                          | 0.15                  | 102                          | 0.01                   | 365                          | 0.04                               | 431                          | 0.00                        | 1023                         |
| Non-carcinogenic human toxicity      | 0.61                | 44                           | 0.10          | 137                          | 0.17                  | 89                           | 0.02                   | 361                          | 0.02                               | 467                          | 0.00                        | 1126                         |
| Freshwater ecotoxicity               | 0.51                | 64                           | 0.07          | 177                          | 0.05                  | 164                          | 0.01                   | 552                          | 0.02                               | 491                          | 0.00                        | 1118                         |
| Land use                             | 0.68                | 61                           | 0.15          | 150                          | 0.12                  | 187                          | 0.01                   | 424                          | 0.05                               | 411                          | 0.00                        | 1171                         |
| Water use                            | 0.74                | 38                           | 0.05          | 166                          | 0.01                  | 156                          | 0.01                   | 633                          | 0.00                               | 600                          | 0.00                        | 931                          |

|                         |      |    |      |     |      |     |      |     |      |     |      |      |
|-------------------------|------|----|------|-----|------|-----|------|-----|------|-----|------|------|
| Fossil resource use     | 0.76 | 34 | 0.17 | 120 | 0.02 | 149 | 0.01 | 500 | 0.00 | 611 | 0.00 | 1004 |
| Minerals and metals use | 0.63 | 43 | 0.02 | 224 | 0.29 | 81  | 0.02 | 410 | 0.01 | 758 | 0.00 | 1100 |

**Table S3:** (continued) Mean and coefficient of variation values for contributions to life cycle impacts of chemical processes ( $N = 711$ ). Hyphens indicate a null value due to a mean of zero. Impacts due to inputs from the environment and emissions to the environment are caused by the natural resources consumed (e.g., water from natural bodies such as rivers) or emissions released directly (e.g., carbon dioxide) by the chemical process, respectively.

| <b><u>Source of impact contribution</u></b>               | <b><u>Inputs to process directly from environment</u></b> |                              | <b><u>Outputs from process directly to environment</u></b> |                              |
|-----------------------------------------------------------|-----------------------------------------------------------|------------------------------|------------------------------------------------------------|------------------------------|
|                                                           | Mean                                                      | Coefficient of variation (%) | Mean                                                       | Coefficient of variation (%) |
| <b>Environmental Footprint life cycle impact category</b> |                                                           |                              |                                                            |                              |
| Climate change                                            | 0.00                                                      | -                            | 0.07                                                       | 279                          |
| Ozone depletion                                           | 0.00                                                      | -                            | 0.02                                                       | 755                          |
| Particulate matter formation                              | 0.00                                                      | -                            | 0.08                                                       | 268                          |
| Acidification                                             | 0.00                                                      | -                            | 0.09                                                       | 262                          |
| Freshwater eutrophication                                 | 0.00                                                      | -                            | 0.03                                                       | 506                          |
| Marine eutrophication                                     | 0.00                                                      | -                            | 0.16                                                       | 184                          |
| Terrestrial eutrophication                                | 0.00                                                      | -                            | 0.09                                                       | 246                          |
| Ionising radiation                                        | 0.00                                                      | -                            | 0.00                                                       | 1989                         |
| Photochemical ozone formation                             | 0.00                                                      | -                            | 0.09                                                       | 230                          |
| Carcinogenic human toxicity                               | 0.00                                                      | -                            | 0.09                                                       | 250                          |
| Non-carcinogenic human toxicity                           | 0.00                                                      | -                            | 0.07                                                       | 269                          |
| Freshwater ecotoxicity                                    | 0.00                                                      | -                            | 0.34                                                       | 104                          |
| Land use                                                  | 0.00                                                      | 1273                         | 0.00                                                       | -                            |
| Water use                                                 | 0.00                                                      | -                            | 0.19                                                       | 140                          |
| Fossil resource use                                       | 0.04                                                      | 513                          | 0.00                                                       | -                            |
| Minerals and metals use                                   | 0.03                                                      | 508                          | 0.00                                                       | -                            |

## S5. Life cycle impact contributions along a supply chain

**Figure 5** in the main manuscript shows the evolution of the life cycle impact contributions for the agrochemical triclopyr and its precursors at various points in its upstream supply chain. For the building blocks, *i.e.*, ammonia and methanol, we found that the impacts of raw material inputs represent relatively minor shares, whereas energy, direct emissions, and infrastructure/construction have a more critical impact on the overall life cycle. On the contrary, for more complex products downstream, the raw material inputs constitute the major share towards the climate change impacts. To delve further into the contributions for triclopyr, **Figure S17** shows the evolution of the life cycle impact contributions along a supply chain, by aggregating the process contributions along the life cycle by their reference product of each activity as in the ecoinvent v3.9 database.

In **Figure S17**, we consider two main categories: life cycle emissions and direct emissions throughout the life cycle, aggregated by their reference product as in the ecoinvent database. The primary feedstock (in blue) encompasses the raw materials required for the production of the chemical (*e.g.*, natural gas or coal) throughout the life cycle. Other intermediates (in light blue, *e.g.*, ethylene, propylene, etc.) are not shown as their primary feedstock equivalents because these processes are included as system processes in the ecoinvent v3.9 database, leading to a lack of data for representation. The life cycle emissions of heat (orange) and electricity (light orange) account for the extraction, transport, and combustion of energy sources (*i.e.*, cradle-to-grave) emissions. Other life cycle emissions, such as transport, wastewater treatment, etc. are categorised as 'others' (in green). Further, the contributions of direct emissions are categorised for each chemical production activity.

From **Figure S17**, we find that for ammonia, the largest impact on climate change is from direct emissions. Heat also contributes a large portion, indicating high energy requirements for production. Similarly, for methanol, the major contributions are heat, electricity, and direct emissions. Primary feedstock (*i.e.*, natural gas) is also one of the major contributors to methanol production impacts, especially because of natural gas leakages during extraction and transportation. Moving further downstream, for the production of triclopyr, around 60% of the impacts are due to heat and electricity throughout the life cycle. Furthermore, other intermediates contribute to pyridine and triclopyr as life cycle emissions from using these raw materials in the production route. Conversely, we identified a reduction in the environmental impact contribution downstream from primary feedstock (*e.g.*, natural gas and coal), as they are mostly employed in the production of the chemical value chain's building blocks.

In summary, all chemicals exhibit significant impacts from energy use (heat and electricity) and direct emissions. Therefore, these impacts accumulate throughout the life cycle, resulting in

higher impacts of chemical production downstream. Furthermore, the life cycle impacts become increasingly varied, implying that each step of the process adds complexity, thereby increasing the environmental impacts, while the impacts of primary feedstock tend to have reduced importance.

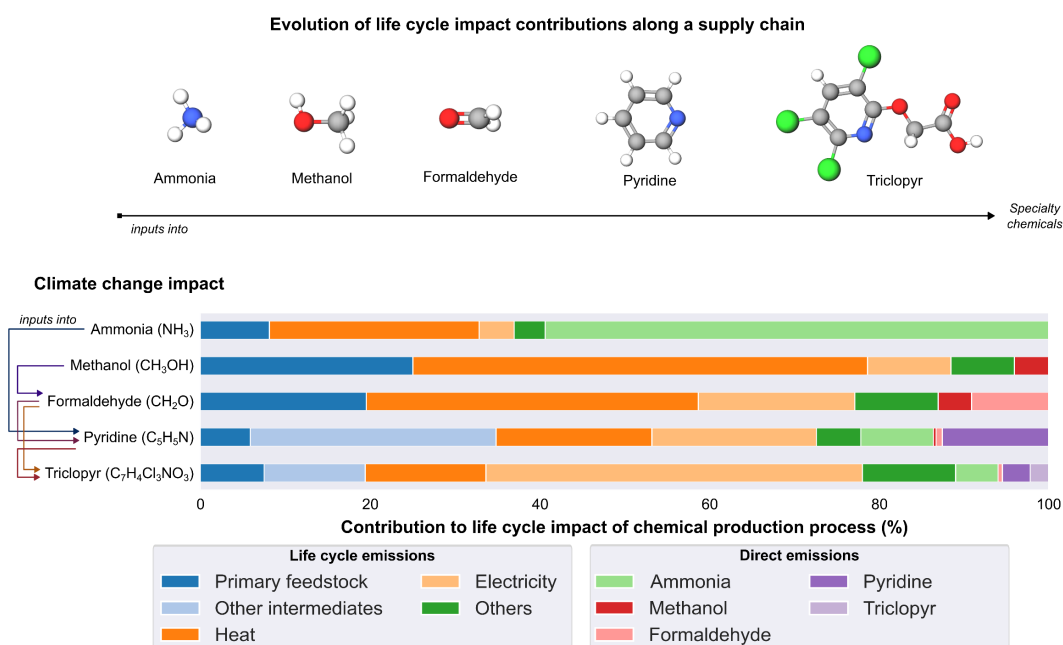

**Figure S17.** Climate change life cycle impact contribution profiles for the agrochemical product triclopyr and its precursors at various points of its upstream supply chain. These contributions are categorised into life cycle emissions (left side of the legend) of primary feedstock (e.g., natural gas and coal), other intermediates (e.g., ethylene, propylene, etc.), heat, electricity, others (i.e., transport, wastewater treatment), and direct emissions (right side of the legend) of individual processes throughout the supply chain. Squares represent feedstock material into the process producing the compound indicated with an arrow.

## **S6. Assumptions and limitations**

This analysis was subject to sources of uncertainty and limitations that affect LCA-based studies in general – namely, aspects related to environmental impact characterisation methods, as well as data availability and quality.

The underlying uncertainty in the characterisation factors that translate natural resource input and emission flows to environmental impacts (*e.g.*, characterising the toxicity effects of emitting a particular substance) means that life cycle impact assessment methods have higher levels of methodological uncertainty than others. Due to challenges in modelling their underlying cause-and-effect mechanisms, environmental categories related to toxicity and resource use are estimated with methods that are currently classified as in need of further improvement and numerical results should be interpreted with caution. However, we sought to consider as many environmental dimensions as possible and deemed it important to include toxicity and resource use related life cycle impacts as these methods are sufficiently fit for the purpose of providing directional insights.

Regarding data on chemical processes, data availability constrained the product and technological coverage of this analysis, while quantitative uncertainty was an important factor to consider when translating our findings. First, there is lower data coverage of more complex, fine chemical products in life cycle inventory databases, such as ecoinvent. Although the inclusion of more processes producing more complex compounds would be greatly beneficial to increasing sample representativeness, we can assume that it would not strengthen the correlation between life cycle impacts and mass- or energy-based process metrics as these compounds require more advanced intermediate inputs with a wider distribution of embedded upstream impacts.

Second, potential measurement errors in life cycle inventory data for the modelling of each chemical process (*i.e.*, uncertain values of material and energy inputs, as well as direct inputs/emissions to/from the environment) introduce uncertainty in the calculated process metrics and life cycle impact values. Additionally, life cycle impact values are subject to uncertainty from other technological activities to which a process is linked throughout its supply chain (*e.g.*, infrastructure activities, which are acknowledged to be uncertain since they are roughly estimated in the ecoinvent database), as well as the uncertainty of impact characterisation methods, as previously noted. Given these various complex sources of uncertainty, we can expect that mass- or energy-based metrics and life cycle impacts are likely to be more weakly correlated compared to the deterministic results we present in the main text. With respect to the central aim of this study, therefore, we do not expect that accounting for the underlying uncertainty of life cycle inventory data would overturn the trends observed and the main conclusions of the analysis.

## References

- 1 G. Wernet, C. Bauer, B. Steubing, J. Reinhard, E. Moreno-Ruiz and B. Weidema, *Int. J. Life Cycle Assess.*, 2016, **21**, 1218–1230.
- 2 C. Mutel, *J. Open Source Softw.*, 2017, **2**, 236.
- 3 Vereinte Nationen, Ed., *International Standard Industrial Classification of All Economic Activities (ISIC)*, United Nations, New York, NY, Rev. 4., 2008.
- 4 R. A. Sheldon, *Green Chem.*, 2017, **19**, 18–43.
- 5 C. Jimenez-Gonzalez, C. S. Ponder, Q. B. Broxterman and J. B. Manley, *Org. Process Res. Dev.*, 2011, **15**, 912–917.
- 6 A. D. Curzons, D. N. Mortimer, D. J. C. Constable and V. L. Cunningham, *Green Chem.*, 2001, **3**, 1–6.
- 7 F. Biganzoli, L. Ceriani, E. Crenna, R. Pant, S. Sala, E. Saouter, D. Versteeg and L. Zampori, *Environmental footprint: update of Life Cycle Impact Assessment Methods : ecotoxicity freshwater, human toxicity cancer, and non-cancer*, Publications Office of the European Union, Luxembourg, 2018.
- 8 E. Commission, J. R. Centre, C. Caldeira, L. Farcas, I. Garmendia Aguirre, L. Mancini, D. Tosches, A. Amelio, K. Rasmussen, H. Rauscher, J. Riego Sintes and S. Sala, *Safe and sustainable by design chemicals and materials – Framework for the definition of criteria and evaluation procedure for chemicals and materials*, Publications Office of the European Union, 2022.
- 9 S. Sala, E. Crenna, M. Secchi and E. Sanyé-Mengual, *J. Environ. Manage.*, 2020, **269**, 110686.
- 10 R. A. Sheldon, *ACS Sustain. Chem. Eng.*, 2018, **6**, 32–48.
- 11 F. Roschangar, R. A. Sheldon and C. H. Senanayake, *Green Chem.*, 2015, **17**, 752–768.
- 12 International Standards Organization, *In ISO 14040:2006 Environmental Management--Life Cycle Assessment--Principles and Framework*, 2006.
- 13 International Standards Organization, *In ISO 14044:2006 Environmental Management--Life Cycle Assessment--Requirements and Guidelines*, 2006.
- 14 R. Heijungs and S. Suh, *The Computational Structure of Life Cycle Assessment*, Springer Netherlands, Dordrecht, 2002, vol. 11.
- 15 E. Huber, V. Bach, P. Holzapfel, D. Blizniukova and M. Finkbeiner, *Sustainability*, 2022, **14**, 3161.
